# Supplementary material for: Ligand engineering of circularly polarized luminescence inversion and enhancement for chiral Ag6 nanoclusters
Source: Royal Society of Chemistry journal article supplement (doi:10.1039/d4tc01280a), 2024-01-01
Supplement: d4tc01280a1.pdf [file d4tc01280a1.pdf]

## **Supporting Information**

### **Ligand Engineering of Circularly Polarized Luminescence Inversion and Enhancement for Chiral Ag<sub>6</sub> Nanoclusters**

Hui Chen, Xiangyang Zhang, Kuo Fu, Xuejuan Wang and Guofeng Liu\*

School of Chemical Science and Engineering, Advanced Research Institute, Tongji  
University, Shanghai, 200092, P. R. China

E-mail: liuguofeng@tongji.edu.cn

## 1 Material.

(S)-3-amino-3-phenylpropan-1-ol, (R)-3-amino-3-phenylpropan-1-ol, chlorosulphonic acid, carbon disulfide potassium hydroxide, triethylamine, (S)-3-aminobutan-1-ol, (R)-3-aminobutan-1-ol, 30% hydrogen peroxide and silver acetate were purchased from Shanghai Titan Scientific Co., Ltd. The organic solvents were purchased from Shanghai Titan Scientific Co., Ltd. without further purification.

## 2 Characterization

NMR spectra were recorded on a Bruker AVANCE III HD 400 MHz and 600 MHz Instrument at ambient temperature. Circular dichroism (CD) spectra were obtained using JASCO J-810 CD spectrometer with a bandwidth of 1.0 nm, scanning speed of 500 nm min<sup>-1</sup>, and data integration time of 1 s. CD spectra of samples were recorded in the UV/Vis region (250–450 nm) using a 0.1 mm quartz cuvette. Fluorescence spectra were measured by F-4500 fluorescence spectrophotometer. CPL measurements were recorded on JASCO CPL-300 spectrometer, with the Ex and Em slit width of 3000  $\mu$ m, scanning speed of 500 nm min<sup>-1</sup>, and data integration time of 1 s. CPL spectra of samples were measured using a 0.1 mm quartz cuvette. The single crystal data were collected from a shock-cooled single crystal at 100(2) K on a Bruker D8 VENTURE dual wavelength Mo three-circle diffractometer with a microfocus sealed X-ray tube using a mirror optics as monochromator and a Bruker PHOTON II detector. The QY were measured using an Edinburgh FLS1000 equipped with a xenon lamp.

## 3 Synthesis

### Synthesis of *S*-SPh

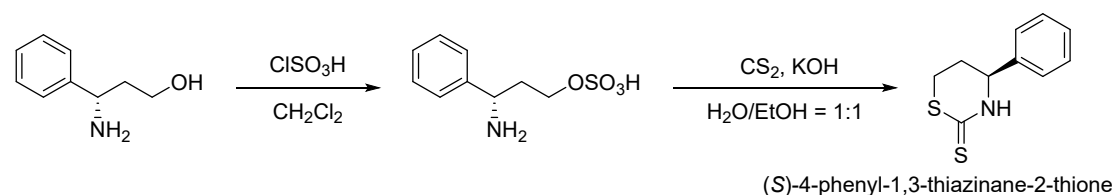

### *(S)*-4-phenyl-1,3-thiazinane-2-thione (*S*-SPh).

Chlorosulphonic acid (1.0 mL, 14.5 mmol) was added dropwise to a solution of (S)-3-amino-3-phenylpropan-1-ol (2.0 mL, 13.8 mmol) in CH<sub>2</sub>Cl<sub>2</sub> (20 mL) under a constant flow of N<sub>2</sub> at 0 °C. The reaction mixture was stirred for 15 h at rt after which the solvent was removed in vacuo to afford a white solid. The white solid was triturated with MeOH and dried under reduced pressure to afford 2.32 g of (S)-3-amino-3-phenylpropyl hydrogen sulfate (10.0 mmol, 72%), which was pure enough by <sup>1</sup>H NMR and required no further purification. Then, CS<sub>2</sub> (0.72 mL, 12 mmol) was added dropwise to (S)-3-amino-3-phenylpropyl hydrogen sulfate (2.32 g, 10.0 mmol) under N<sub>2</sub> at rt. A solution of KOH (1.23 g, 22 mmol in 1:1 H<sub>2</sub>O/EtOH 20 mL) was added dropwise to the reaction mixture at 0 °C. The resulting solution was then heated to reflux and stirred for 2 h, after which it was further stirred overnight at rt. Then, it was cooled with an ice-water bath. The white precipitate was filtered and rinsed with cold

water. It was dissolved in  $\text{CH}_2\text{Cl}_2$ , and dried over anhydrous  $\text{Na}_2\text{SO}_4$ , and the solvent was removed in vacuo to obtain a white solid. The crude product was purified by recrystallization in  $\text{CH}_2\text{Cl}_2$ /hexane to obtain the (S)-4-phenyl-1,3-thiazinane-2-thione (S-SPh, 1.8 g, 62% for two steps).

**Physical State:** white solid.

**TLC:**  $R_f = 0.32$  (PE/EtOAc = 1:1).

**$^1\text{H}$  NMR (400 MHz, DMSO- $d_6$ )**  $\delta$  10.62 (s, 1H), 7.41 (t,  $J = 7.5$  Hz, 2H), 7.32 (t,  $J = 7.3$  Hz, 1H), 7.22 (d,  $J = 7.3$  Hz, 2H), 4.82 (d, 1H), 2.89 – 2.78 (m, 1H), 2.66 – 2.54 (m, 1H), 2.26 – 2.12 (m, 2H).

**$^{13}\text{C}$  NMR (101 MHz, DMSO- $d_6$ )**  $\delta$  193.21, 141.38, 129.08, 128.02, 126.60, 56.66, 27.94, 26.65.

# <sup>1</sup>H spectra of S-SPh

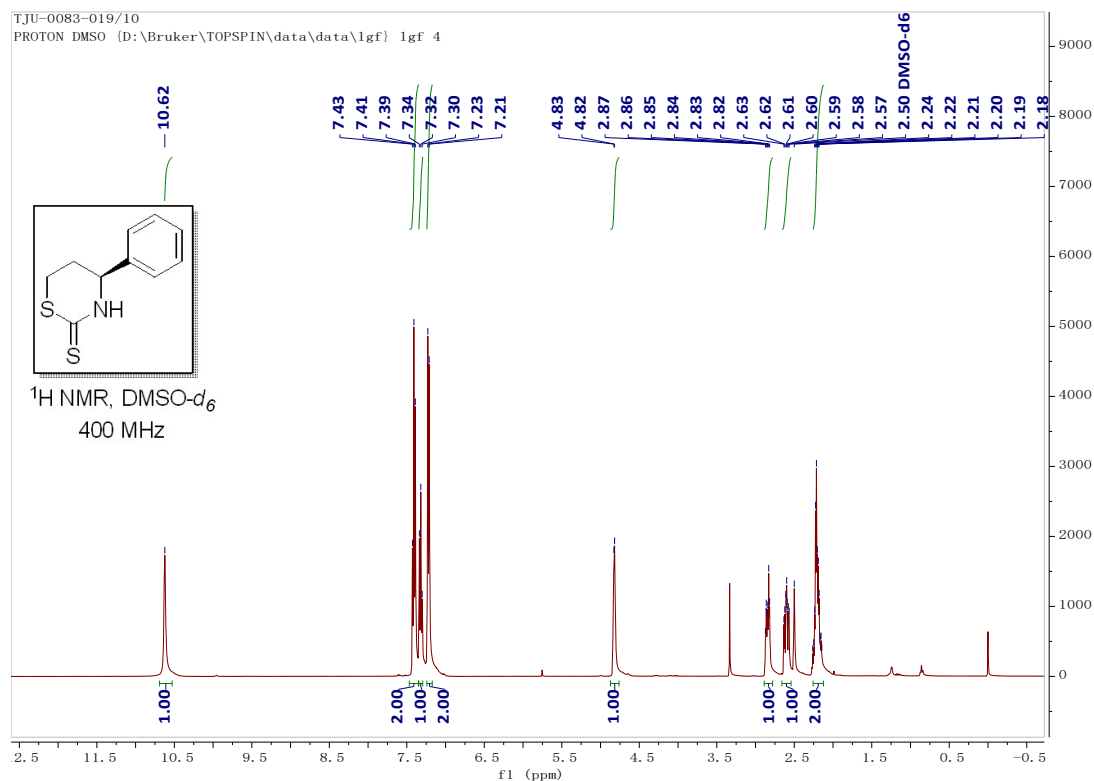

# <sup>13</sup>C spectra of S-SPh

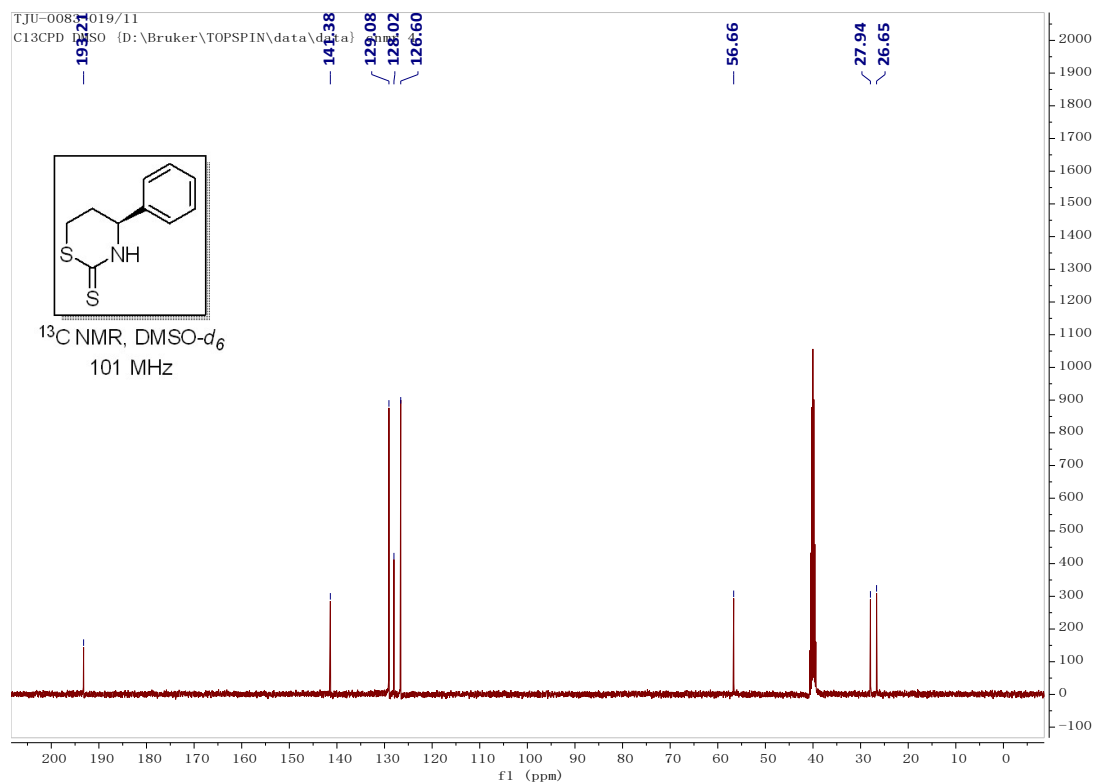

### Synthesis of R-SPh

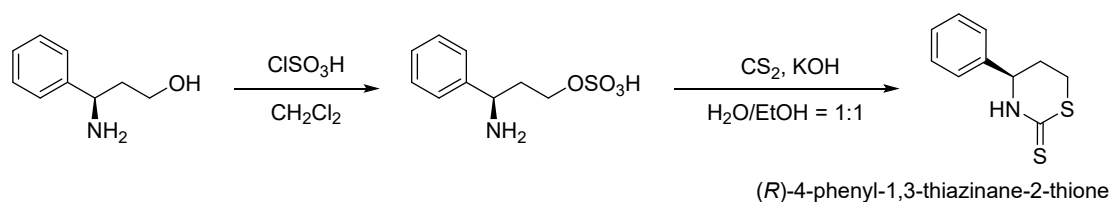

#### **(R)-4-phenyl-1,3-thiazinane-2-thione (R-SPh).**

Chlorosulphonic acid (0.5 mL, 7 mmol) was added dropwise to a solution of (R)-3-amino-3-phenylpropan-1-ol (1 g, 6.6 mmol) in  $\text{CH}_2\text{Cl}_2$  (15 mL) under a constant flow of  $\text{N}_2$  at  $0^\circ\text{C}$ . The reaction mixture was stirred for 15 h at RT after which the solvent was removed in vacuo to afford a white solid. The white solid was triturated with MeOH and dried under reduced pressure to afford 1.04 g of (R)-3-amino-3-phenylpropyl hydrogen sulfate (4.5 mmol, 68%), which was pure enough by  $^1\text{H}$  NMR and required no further purification. Then,  $\text{CS}_2$  (0.4 mL, 5.3 mmol) was added dropwise to (R)-3-amino-3-phenylpropyl hydrogen sulfate (1.04 g, 4.4 mmol) under  $\text{N}_2$  at RT. A solution of KOH (560 mg, 10 mmol in 1:1  $\text{H}_2\text{O}/\text{EtOH}$  20 mL) was added dropwise to the reaction mixture at  $0^\circ\text{C}$ . The resulting solution was then heated to reflux and stirred for 2 h, after which it was further stirred overnight at rt. Then, it was cooled with an ice-water bath. The white precipitate was filtered and rinsed with cold water. It was dissolved in  $\text{CH}_2\text{Cl}_2$ , and dried over anhydrous  $\text{Na}_2\text{SO}_4$ , and the solvent was removed in vacuo to obtain a white solid. The crude product was purified by recrystallization in  $\text{CH}_2\text{Cl}_2$ /hexane to obtain the (R)-4-phenyl-1,3-thiazinane-2-thione (R-SPh, 820 mg, 60% for two steps).

**Physical State:** white solid.

**TLC:**  $R_f = 0.32$  (PE/EtOAc = 1:1).

**$^1\text{H}$  NMR (600 MHz,  $\text{DMSO}-d_6$ )**  $\delta$  10.63 (s, 1H), 7.41 (t,  $J = 7.5$  Hz, 2H), 7.32 (t,  $J = 7.2$  Hz, 1H), 7.22 (d,  $J = 7.9$  Hz, 2H), 4.82 (s, 1H), 2.87 – 2.82 (m, 1H), 2.60 (td,  $J = 12.4$ , 11.5, 3.7 Hz, 1H), 2.25 – 2.17 (m, 2H).

**$^{13}\text{C}$  NMR (101 MHz,  $\text{DMSO}-d_6$ )**  $\delta$  193.20, 141.38, 129.07, 128.02, 126.60, 56.66, 27.94, 26.65.

### <sup>1</sup>H spectra of R-SPh

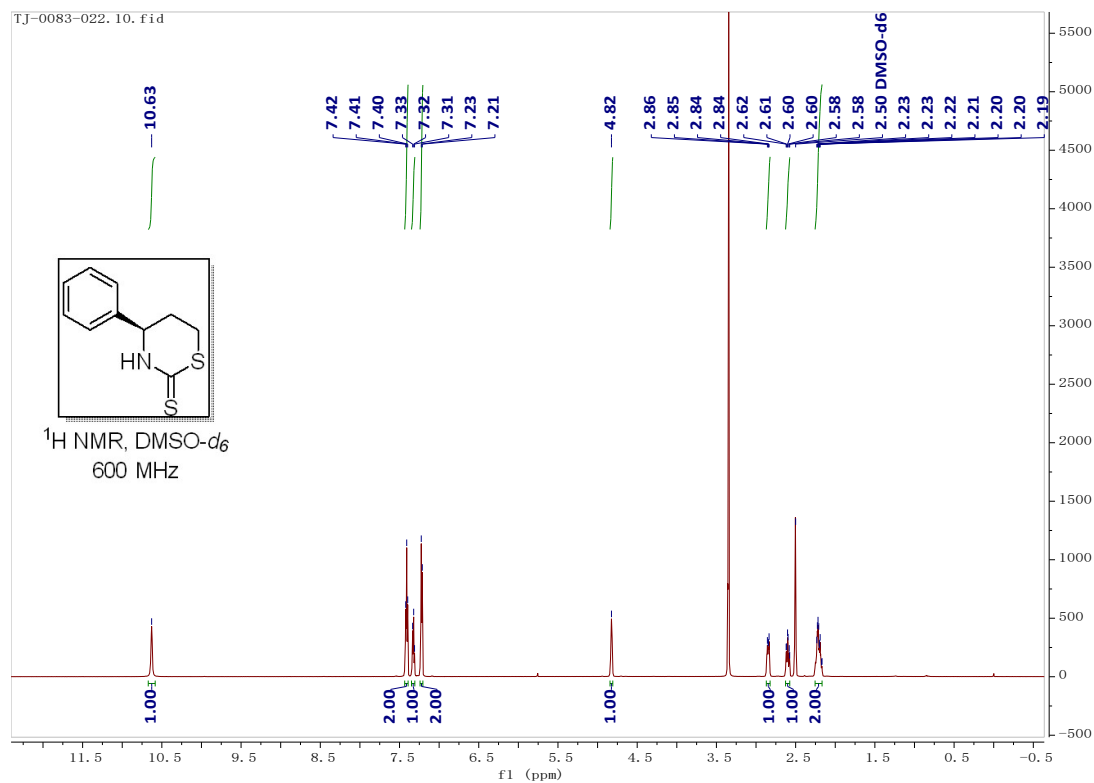

### <sup>13</sup>C spectra of R-SPh

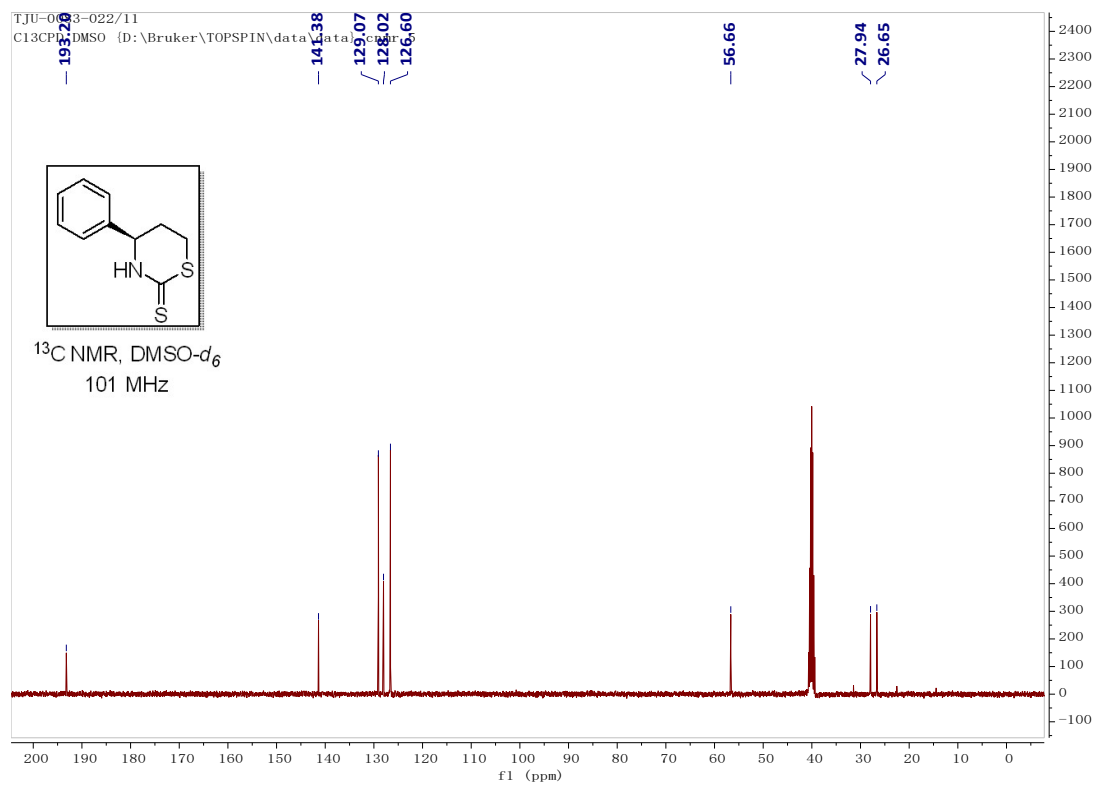

### Synthesis of S-SMe

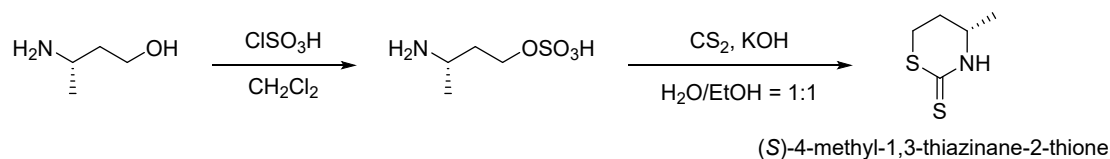

#### **(S)-4-methyl-1,3-thiazinane-2-thione (S-SMe).**

Chlorosulphonic acid (0.7 mL, 10.5 mmol) was added dropwise to a solution of (S)-3-aminobutan-1-ol (890 mg, 10 mmol) in CH<sub>2</sub>Cl<sub>2</sub> (25 mL) under a constant flow of N<sub>2</sub> at 0°C. The reaction mixture was stirred for 15 h at RT after which the solvent was removed in vacuo to afford a white solid. The white solid was triturated with MeOH and dried under reduced pressure to afford 1.18 g of (S)-3-aminobutyl hydrogen sulfate (7 mmol, 70%), which was pure enough by <sup>1</sup>H NMR and required no further purification. Then, CS<sub>2</sub> (0.63 mL, 10.5 mmol) was added dropwise to (R)-3-aminobutyl hydrogen sulfate (1.18 g, 7 mmol) under N<sub>2</sub> at RT. A solution of KOH (840 mg, 15 mmol) in 1:1 H<sub>2</sub>O/EtOH (25 mL) was added dropwise to the reaction mixture at 0 °C. The resulting solution was then heated to reflux and stirred for 2 h, after which it was further stirred overnight at rt. Then, it was cooled with an ice-water bath. The white precipitate was filtered and rinsed with cold water. It was dissolved in CH<sub>2</sub>Cl<sub>2</sub>, and dried over anhydrous Na<sub>2</sub>SO<sub>4</sub>, and the solvent was removed in vacuo to obtain a white solid. The crude product was purified by recrystallization in CH<sub>2</sub>Cl<sub>2</sub>/hexane to obtain the (S)-4-methyl-1,3-thiazinane-2-thione (S-SMe, 970 mg, 66% for two steps).

**TLC:** R<sub>f</sub> = 0.40 (PE/EtOAc = 1:1).

**Physical State:** white solid.

**TLC:** R<sub>f</sub> = 0.40 (PE/EtOAc = 1:1).

**<sup>1</sup>H NMR (400 MHz, DMSO-*d*<sub>6</sub>)** δ 10.18 (s, 1H), 3.56 – 3.48 (m, 1H), 3.01 (ddd, *J* = 13.3, 9.9, 3.7 Hz, 1H), 2.94 – 2.86 (m, 1H), 2.12 – 2.05 (m, 1H), 1.71 – 1.64 (m, 1H), 1.20 (d, *J* = 6.6 Hz, 3H).

**<sup>13</sup>C NMR (101 MHz, DMSO-*d*<sub>6</sub>)** δ 192.30, 50.21, 28.41, 27.78, 20.79.

# <sup>1</sup>H spectra of S-SMe

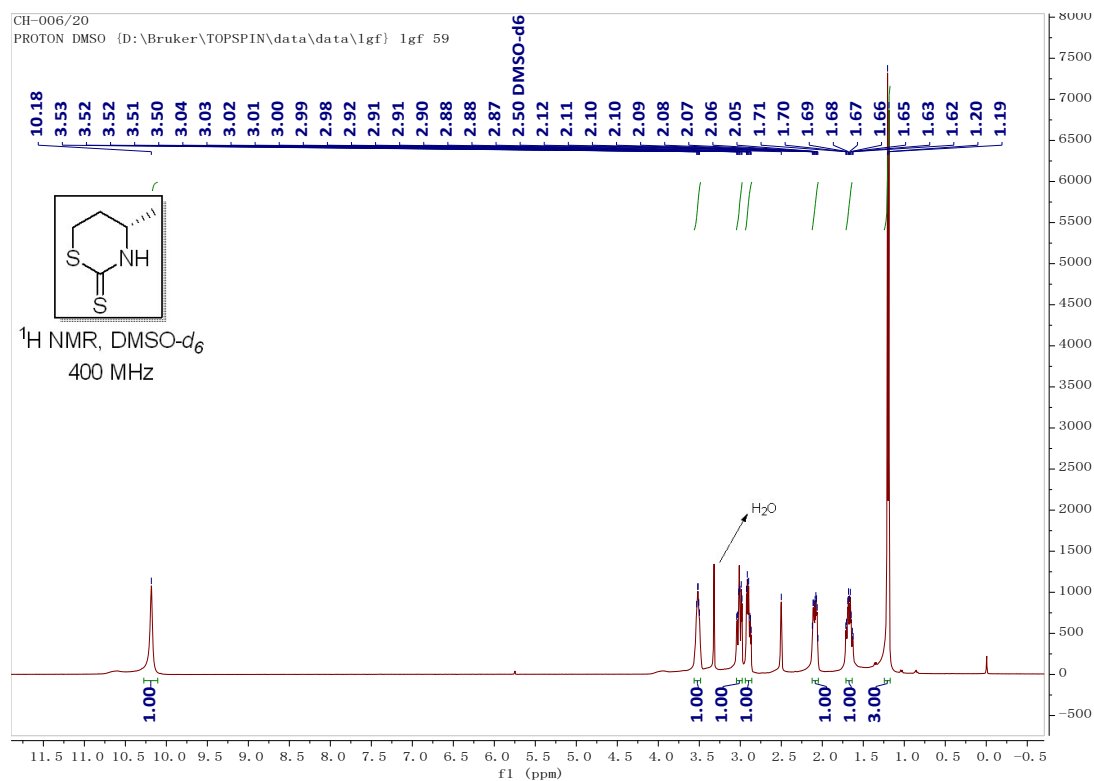

# <sup>13</sup>C spectra of S-SMe

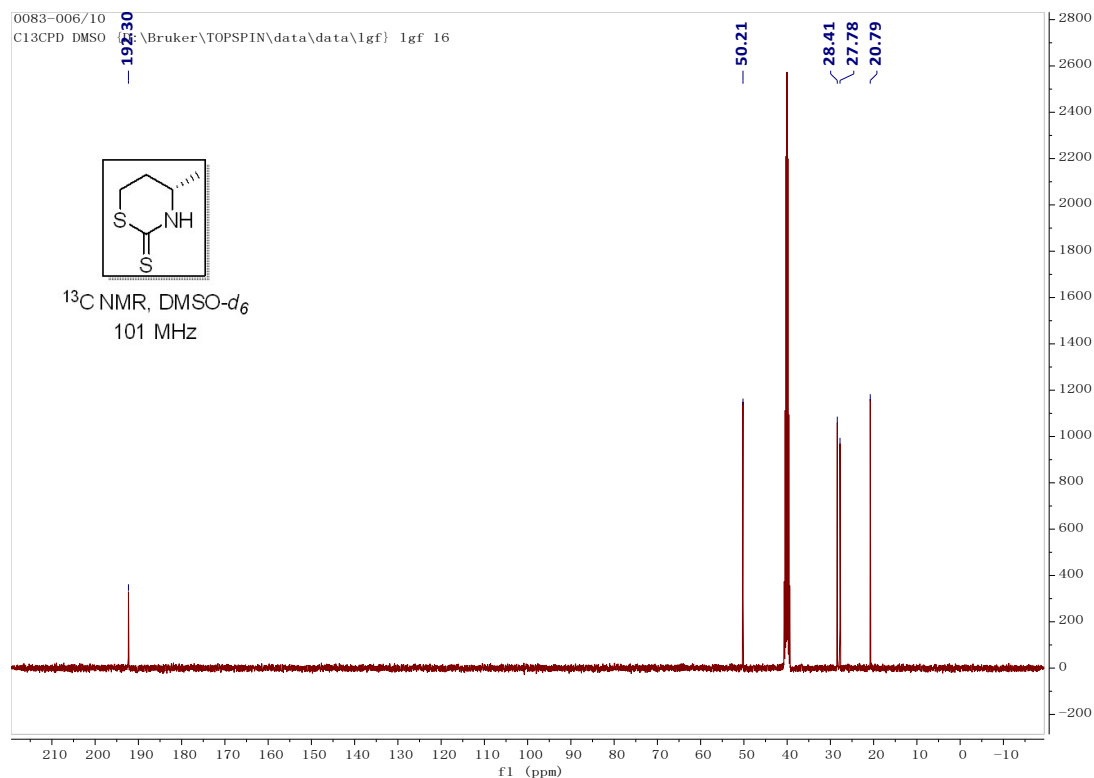



### Synthesis of R-SMe

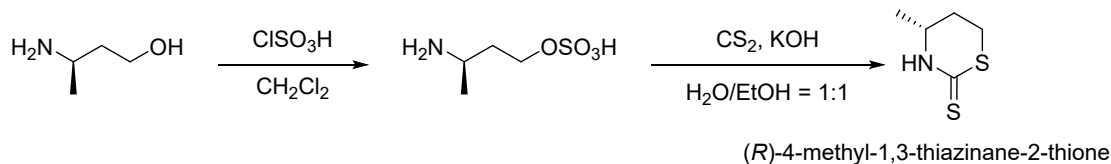

#### **(*R*)-4-methyl-1,3-thiazinane-2-thione (*R*-SMe).**

Chlorosulphonic acid (2.1 mL, 31.5 mmol) was added dropwise to a solution of (*R*)-3-aminobutan-1-ol (2.67 g, 30 mmol) in  $\text{CH}_2\text{Cl}_2$  (100 mL) under a constant flow of  $\text{N}_2$  at  $0^\circ\text{C}$ . The reaction mixture was stirred for 15 h at RT after which the solvent was removed in vacuo to afford a white solid. The white solid was triturated with MeOH and dried under reduced pressure to afford 3.8 g of (*R*)-3-aminobutyl hydrogen sulfate (22.5 mmol, 75%), which was pure enough by  $^1\text{H}$  NMR and required no further purification. Then,  $\text{CS}_2$  (1.63 mL, 27 mmol) was added dropwise to (*R*)-3-aminobutyl hydrogen sulfate (3.8 g, 22.5 mmol) under  $\text{N}_2$  at RT. A solution of KOH (2.8 g, 50 mmol in 1:1  $\text{H}_2\text{O}/\text{EtOH}$  100 mL) was added dropwise to the reaction mixture at  $0^\circ\text{C}$ . The resulting solution was then heated to reflux and stirred for 2 h, after which it was further stirred overnight at rt. Then, it was cooled with an ice-water bath. The white precipitate was filtered and rinsed with cold water. It was dissolved in  $\text{CH}_2\text{Cl}_2$ , and dried over anhydrous  $\text{Na}_2\text{SO}_4$ , and the solvent was removed in vacuo to obtain a white solid. The crude product was purified by recrystallization in  $\text{CH}_2\text{Cl}_2$ /hexane to obtain the (*R*)-4-methyl-1,3-thiazinane-2-thione (*R*-SMe, 3.17 g, 72% for two steps).

**TLC:**  $R_f = 0.40$  (PE/EtOAc = 1:1).

**$^1\text{H}$  NMR (400 MHz,  $\text{DMSO}-d_6$ )**  $\delta$  10.17 (s, 1H), 3.56 – 3.48 (m, 1H), 3.01 (ddd,  $J = 13.1, 9.9, 3.7$  Hz, 1H), 2.93 – 2.86 (m, 1H), 2.12 – 2.05 (m, 1H), 1.72 – 1.62 (m, 1H), 1.20 (d,  $J = 6.6$  Hz, 3H).

**$^{13}\text{C}$  NMR (101 MHz,  $\text{DMSO}-d_6$ )**  $\delta$  192.28, 50.21, 28.42, 27.77, 20.79.

## <sup>1</sup>H spectra of *R*-SMe

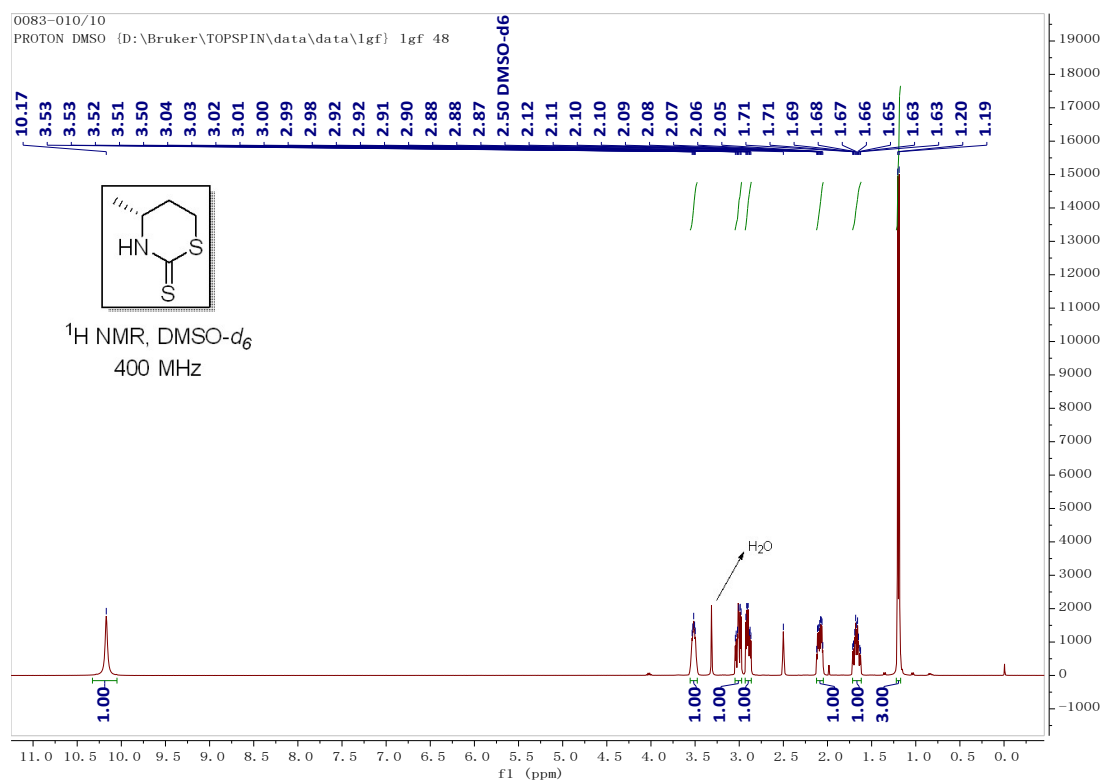

## <sup>13</sup>C spectra of *R*-SMe

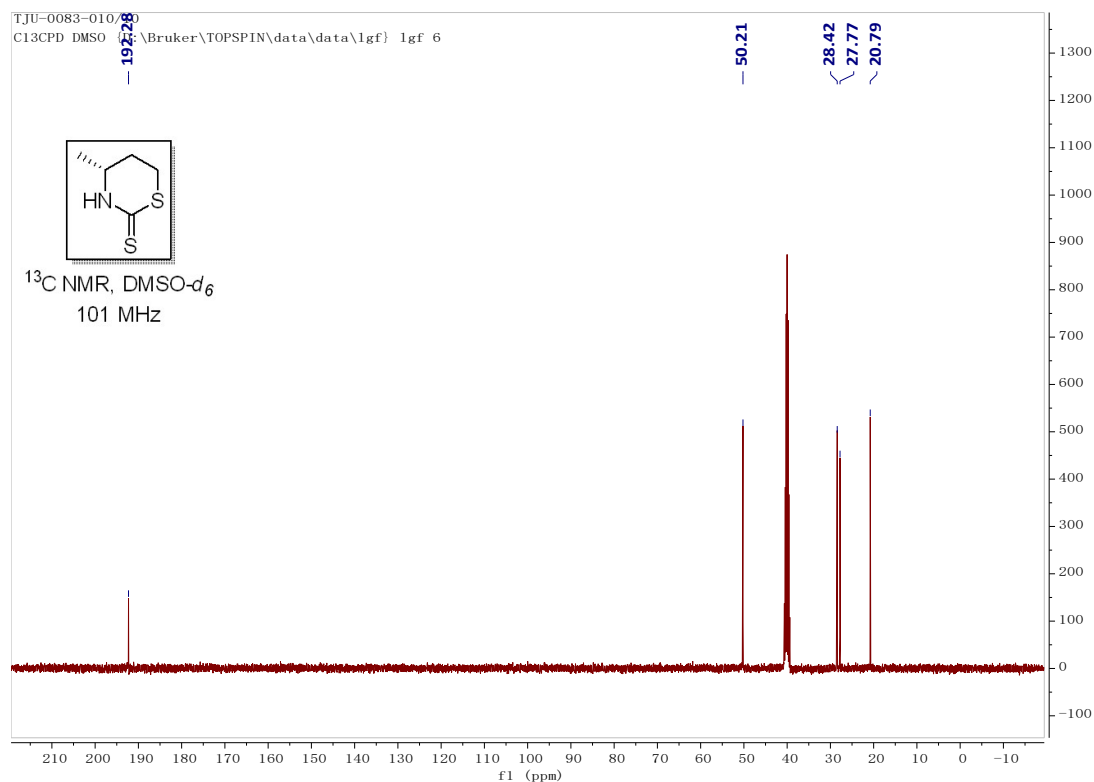

### Synthesis of *S*-O<sub>Ph</sub>

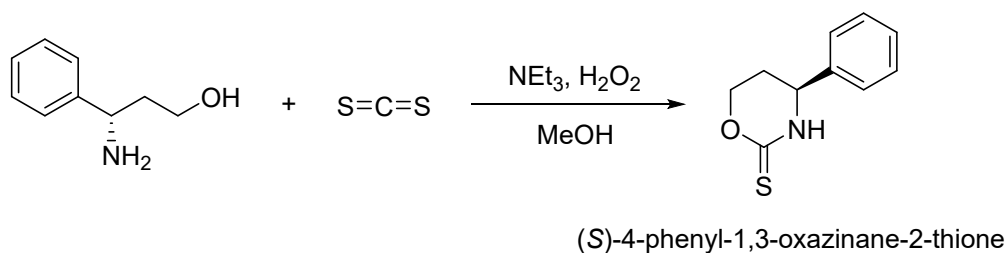

#### **(S)-4-phenyl-1,3-oxazinane-2-thione (*S*-O<sub>Ph</sub>).**

The triethylamine (0.92 mL, 6.6 mmol) was added to a solution of (*S*)-3-amino-3-phenylpropan-1-ol (1.0 g, 6.6 mmol) in methanol (20 mL) at 0°C, while carbon disulfide (0.4 mL, 6.6 mmol) is added dropwise. Then the solution is stirred at room temperature for 30 min. Hydrogen peroxide (30%, 0.43 mL, 8 mmol) is then added and stirred for 2 h. The methanol was removed by reduced pressure and the resulting mixture was diluted with CH<sub>2</sub>Cl<sub>2</sub> (100 mL) and then was washed with H<sub>2</sub>O (2×50 mL). The organic layer was dried over anhydrous Na<sub>2</sub>SO<sub>4</sub>, filtered, and then concentrated to dryness under vacuum. The crude product was purified by recrystallization in CH<sub>2</sub>Cl<sub>2</sub>/hexane to obtain the (*S*)-4-phenyl-1,3-oxazinane-2-thione (*S*-O<sub>Ph</sub>, 1.04 g, 82%).

**Physical State:** white solid.

**TLC:** R<sub>f</sub> = 0.38 (PE/EtOAc = 1:1).

**<sup>1</sup>H NMR (400 MHz, DMSO-*d*<sub>6</sub>)** δ 9.95 (s, 1H), 7.40 (t, *J* = 7.4 Hz, 2H), 7.32 (t, *J* = 7.3 Hz, 1H), 7.26 (d, *J* = 7.3 Hz, 2H), 4.64 (td, *J* = 5.8, 2.5 Hz, 1H), 4.32 – 4.26 (m, 1H), 4.13 – 4.07 (m, 1H), 2.33 – 2.25 (m, 1H), 1.96 – 1.88 (m, 1H).

**<sup>13</sup>C NMR (101 MHz, DMSO-*d*<sub>6</sub>)** δ 186.49, 141.79, 129.02, 128.07, 126.69, 65.78, 53.99, 28.79.

## <sup>1</sup>H spectra of *S*-OPh

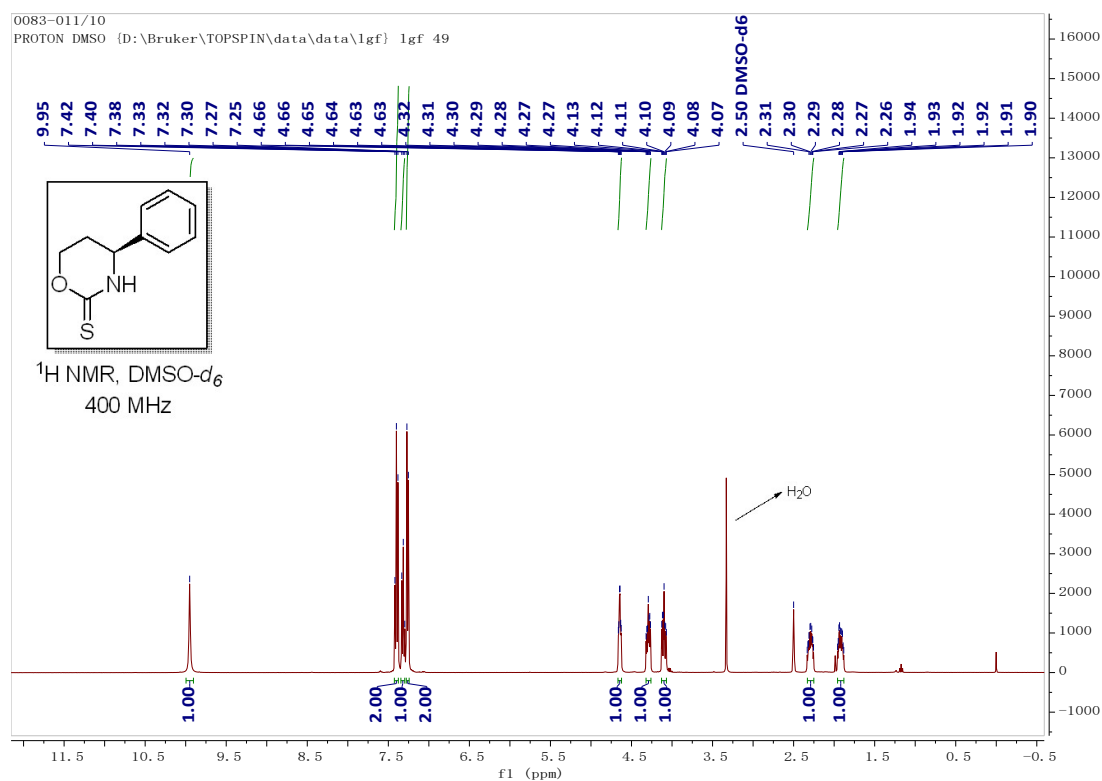

## <sup>13</sup>C spectra of *S*-OPh

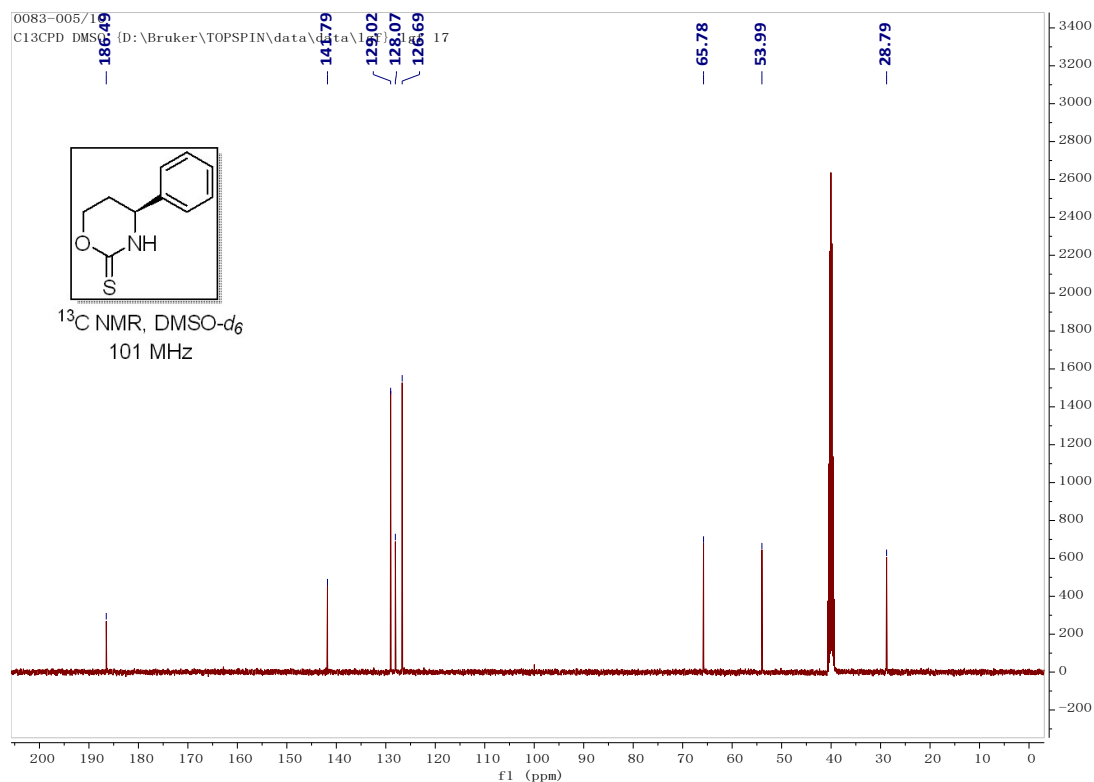

### Synthesis of R-OPh

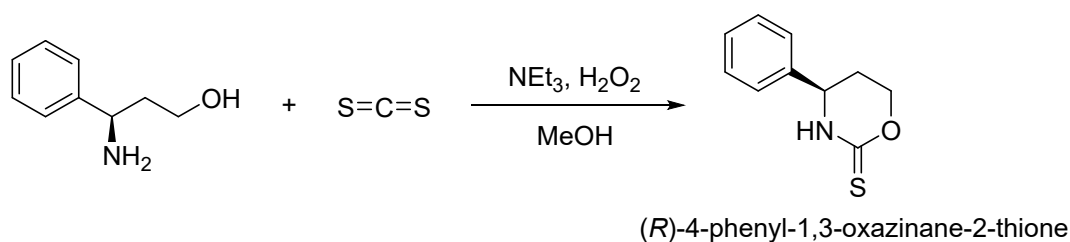

#### **(R)-4-phenyl-1,3-oxazinane-2-thione (R-OPh).**

The triethylamine (0.56 mL, 4 mmol) was added to a solution of (R)-3-amino-3-phenylpropan-1-ol (605 mg, 4 mmol) in methanol (10 mL) at 0°C, while carbon disulfide (0.24 mL, 4 mmol) is added dropwise. Then the solution is stirred at room temperature for 30 min. Hydrogen peroxide (30%, 0.26 mL, 8 mmol) is then added and stirred for 2 h. The methanol was removed by reduced pressure and the resulting mixture was diluted with CH<sub>2</sub>Cl<sub>2</sub> (100 mL) and then was washed with H<sub>2</sub>O (2×50 mL). The organic layer was dried over anhydrous Na<sub>2</sub>SO<sub>4</sub>, filtered, and then concentrated to dryness under vacuum. The crude product was purified by recrystallization in CH<sub>2</sub>Cl<sub>2</sub>/hexane to obtain the (R)-4-phenyl-1,3-oxazinane-2-thione (R-OPh, 586 mg, 76%).

**Physical State:** white solid.

**TLC:** R<sub>f</sub> = 0.38 (PE/EtOAc = 1:1).

**<sup>1</sup>H NMR (400 MHz, DMSO-*d*<sub>6</sub>)** δ 9.95 (s, 1H), 7.40 (t, J = 7.4 Hz, 2H), 7.32 (t, J = 7.3 Hz, 1H), 7.26 (d, J = 7.1 Hz, 2H), 4.64 (td, J = 5.8, 2.5 Hz, 1H), 4.33 – 4.26 (m, 1H), 4.13 – 4.07 (m, 1H), 2.33 – 2.25 (m, 1H), 1.96 – 1.88 (m, 1H).

**<sup>13</sup>C NMR (101 MHz, DMSO-*d*<sub>6</sub>)** δ 186.49, 141.79, 129.02, 128.07, 126.69, 65.78, 53.99, 28.79.

## <sup>1</sup>H spectra of *R*-OPh

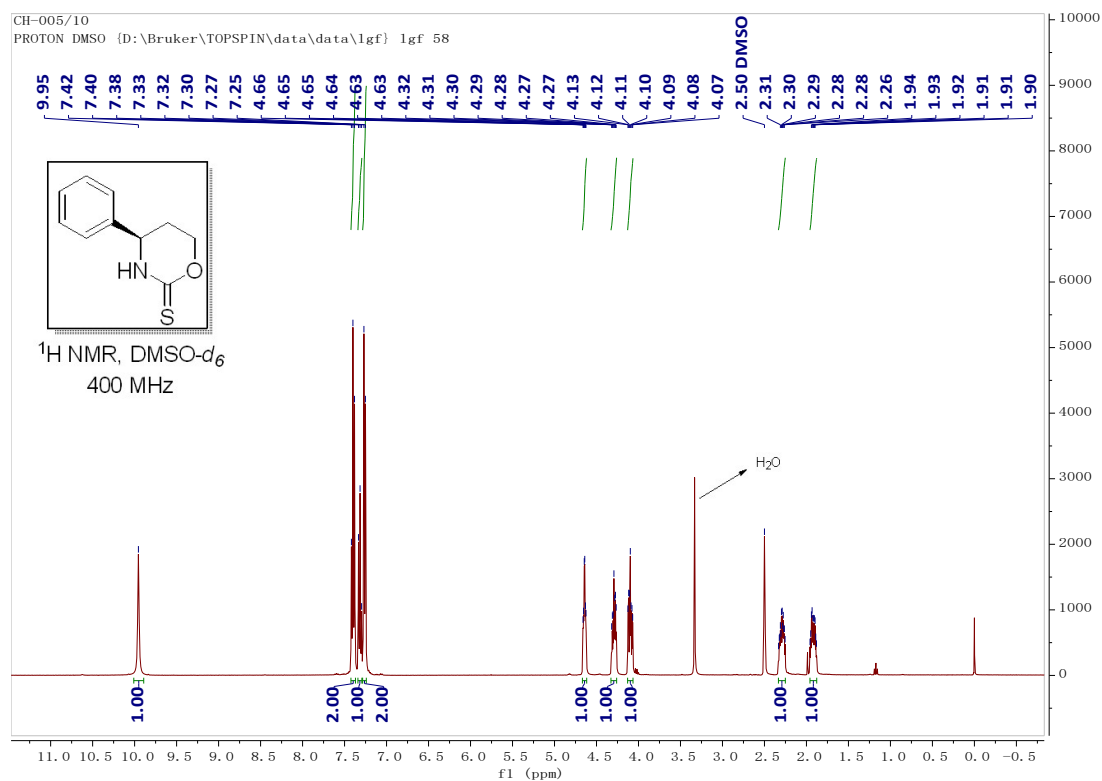

## <sup>13</sup>C spectra of *R*-OPh

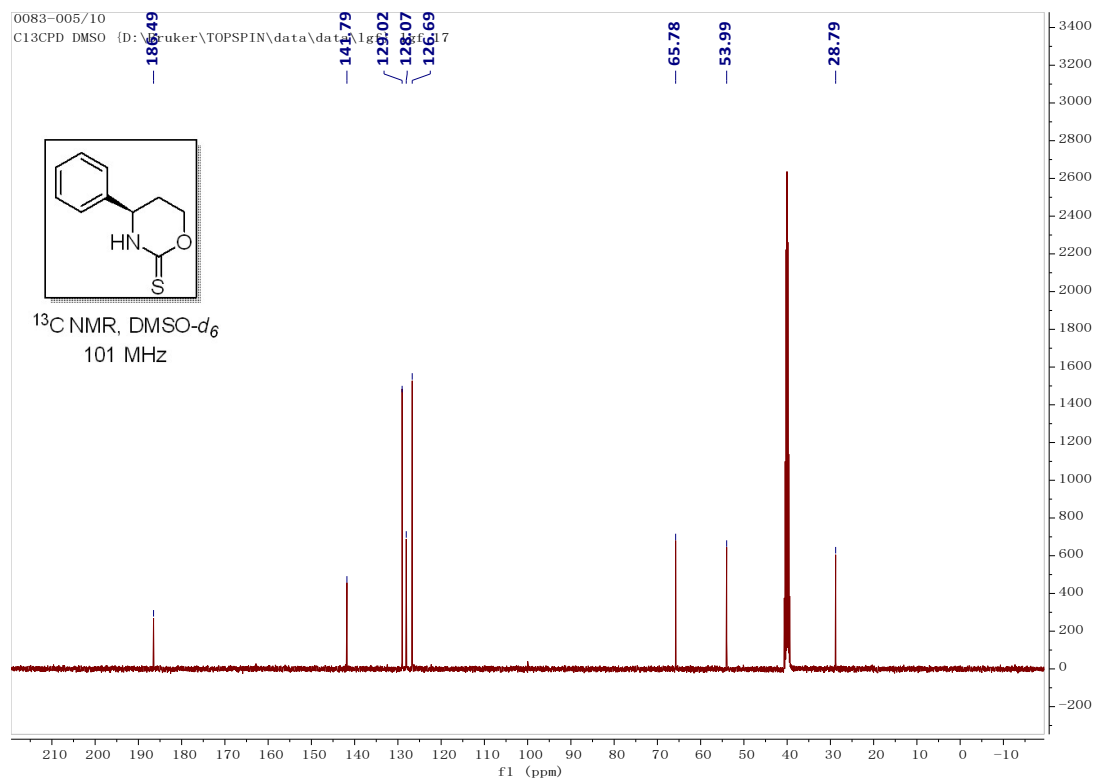

### Synthesis of *S*-OMe

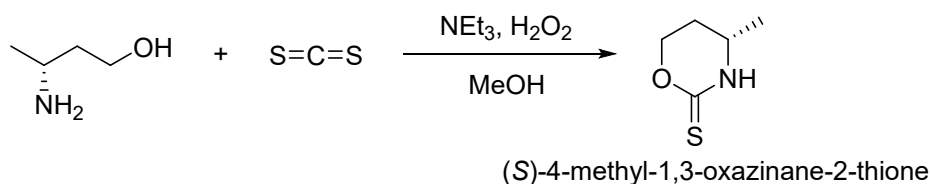

#### **(S)-4-methyl-1,3-oxazinane-2-thione (*S*-OMe)**

The triethylamine (1.8 mL, 13 mmol) was added to a solution of (S)-3-aminobutan-1-ol (1.16 g, 13 mmol) in methanol (30 mL) at 0°C, while carbon disulfide (0.78 mL, 13 mmol) is added dropwise. Then the solution is stirred at room temperature for 30 min. Hydrogen peroxide (30%, 0.85 mL, 26 mmol) is then added and stirred for 2 h. The methanol was removed by reduced pressure and the resulting mixture was diluted with CH<sub>2</sub>Cl<sub>2</sub> (100 mL) and then was washed with H<sub>2</sub>O (2×50 mL). The organic layer was dried over anhydrous Na<sub>2</sub>SO<sub>4</sub>, filtered, and then concentrated to dryness under vacuum. The crude product was purified by recrystallization in CH<sub>2</sub>Cl<sub>2</sub>/hexane to obtain the (S)-4-methyl-1,3-oxazinane-2-thione (*S*-OMe, 936 mg, 55%).

**Physical State:** white solid.

**TLC:** R<sub>f</sub> = 0.30 (PE/EtOAc = 1:1).

**<sup>1</sup>H NMR (400 MHz, DMSO-*d*<sub>6</sub>)** δ 9.56 (s, 1H), 4.30 – 4.25 (m, 1H), 4.20 (td, *J* = 11.2, 10.2, 3.2 Hz, 1H), 3.47 (q, *J* = 6.5 Hz, 1H), 2.05 – 1.98 (m, 1H), 1.62 – 1.54 (m, 1H), 1.13 (d, *J* = 6.5 Hz, 3H).

**<sup>13</sup>C NMR (101 MHz, DMSO-*d*<sub>6</sub>)** δ 185.68, 66.83, 46.86, 27.68, 21.17.

## <sup>1</sup>H spectra of S-OMe

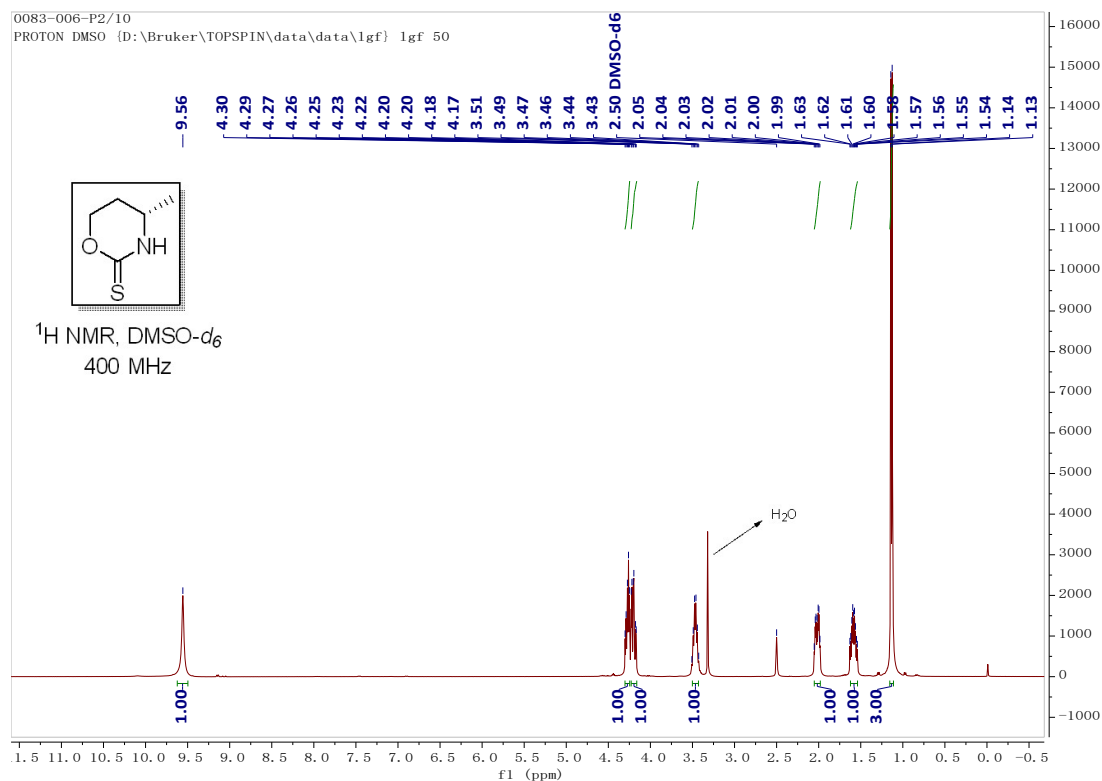

## <sup>13</sup>C spectra of S-OMe

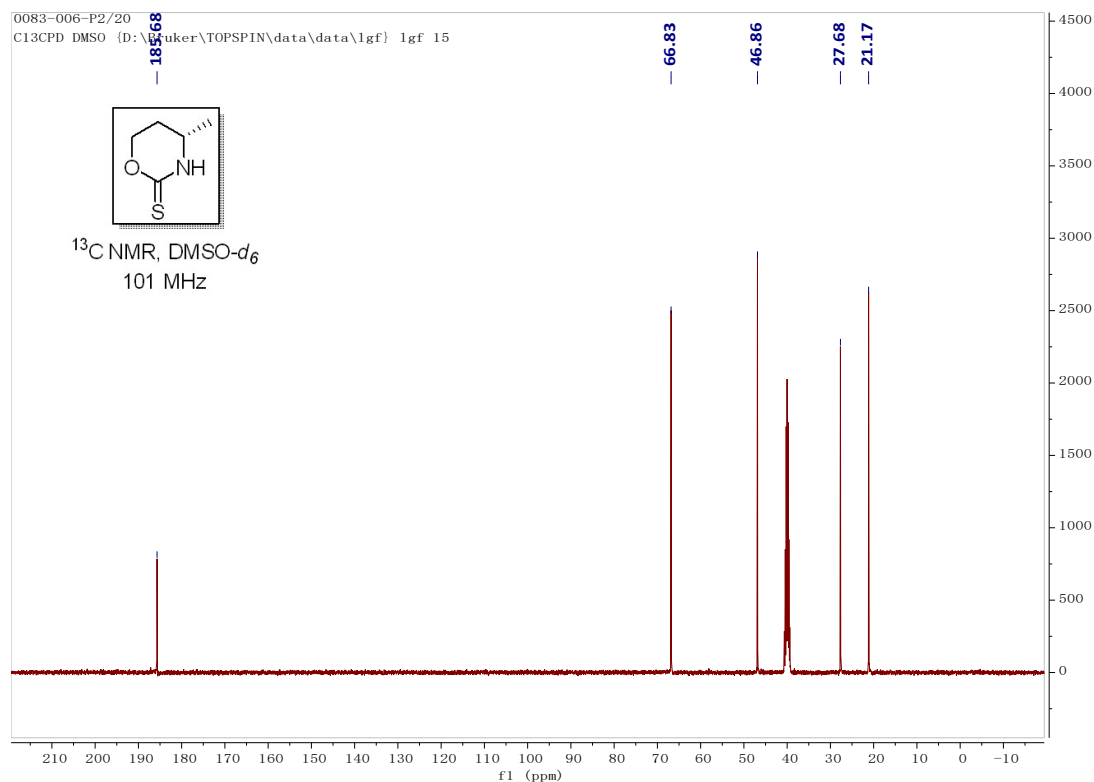



### Synthesis of R-OMe

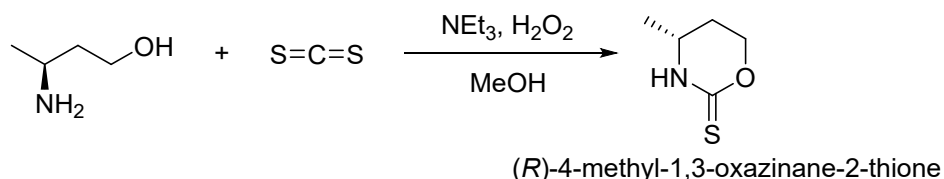

#### **(R)-4-methyl-1,3-thiazinane-2-thione (R-OMe).**

The triethylamine (1.8 mL, 13 mmol) was added to a solution of (R)-3-aminobutan-1-ol (1.16 g, 13 mmol) in methanol (30 mL) at 0°C, while carbon disulfide (0.78 mL, 13 mmol) is added dropwise. Then the solution is stirred at room temperature for 30 min. Hydrogen peroxide (30%, 0.85 mL, 26 mmol) is then added and stirred for 2 h. The methanol was removed by reduced pressure and the resulting mixture was diluted with CH<sub>2</sub>Cl<sub>2</sub> (100 mL) and then was washed with H<sub>2</sub>O (2×50 mL). The organic layer was dried over anhydrous Na<sub>2</sub>SO<sub>4</sub>, filtered, and then concentrated to dryness under vacuum. The crude product was purified by recrystallization in CH<sub>2</sub>Cl<sub>2</sub>/hexane to obtain the (R)-4-methyl-1,3-oxazinane-2-thione (R-OMe, 1.02 g, 60%).

**Physical State:** white solid.

**TLC:** R<sub>f</sub> = 0.30 (PE/EtOAc = 1:1).

**<sup>1</sup>H NMR (400 MHz, DMSO-*d*<sub>6</sub>)** δ 9.57 (s, 1H), 4.31 – 4.24 (m, 1H), 4.20 (td, *J* = 11.2, 10.3, 3.2 Hz, 1H), 3.52 – 3.42 (m, 1H), 2.06 – 1.97 (m, 1H), 1.58 (dtd, *J* = 13.5, 9.0, 4.0 Hz, 1H), 1.14 (d, *J* = 6.5 Hz, 3H).

**<sup>13</sup>C NMR (101 MHz, DMSO-*d*<sub>6</sub>)** δ 185.67, 66.83, 46.85, 27.67, 21.17.

## <sup>1</sup>H spectra of R-OMe

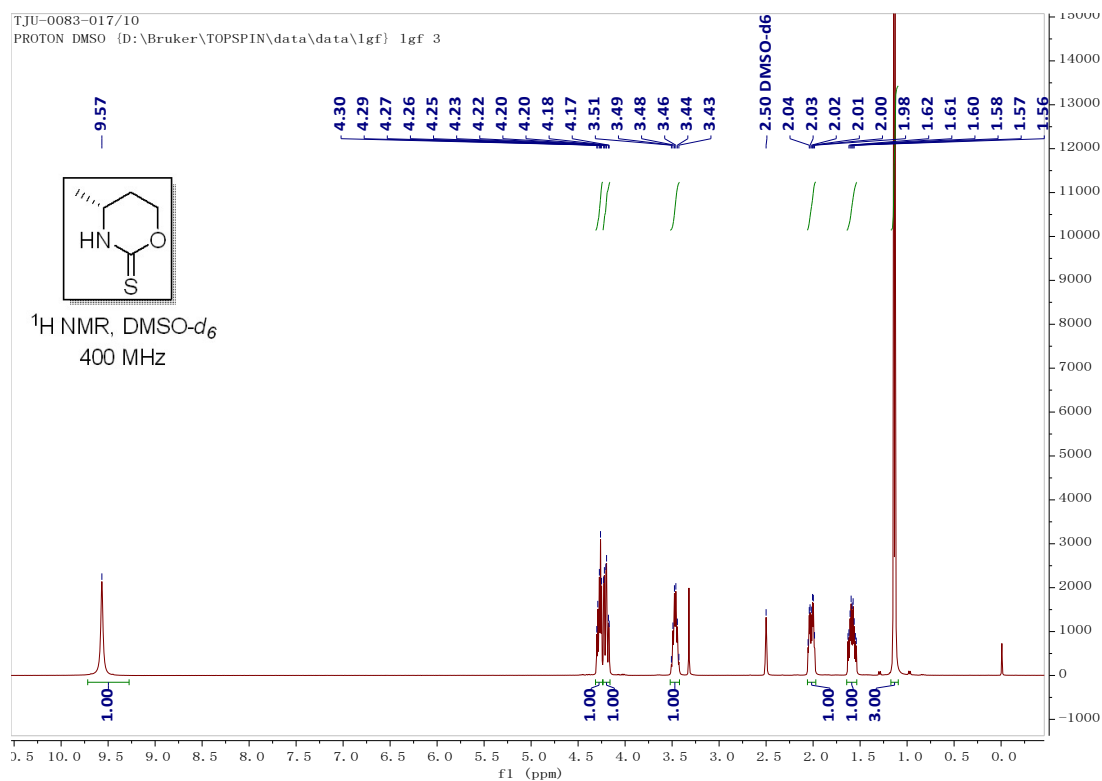

## <sup>13</sup>C spectra of R-OMe

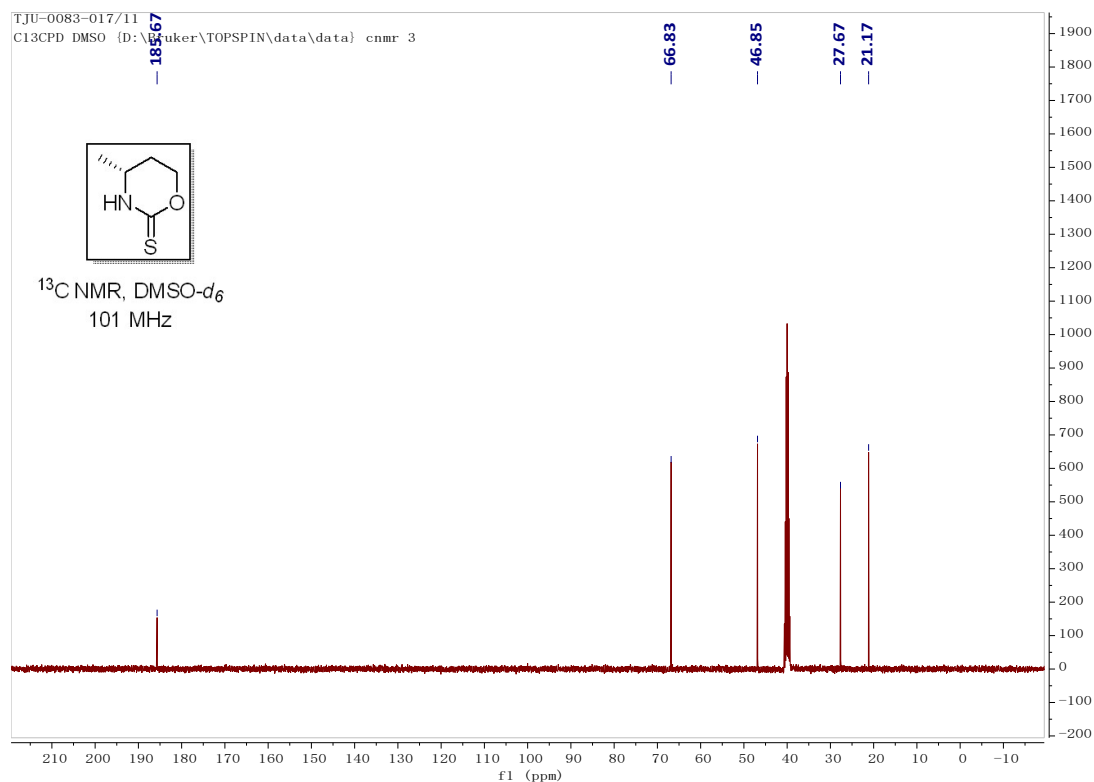

#### 4 X-ray crystal structure data

**Table S1.** X-ray crystal structure of R-AgSMe

|                                             |                                                                                |
|---------------------------------------------|--------------------------------------------------------------------------------|
| Identification code                         | 2342767                                                                        |
| Empirical formula                           | C <sub>30</sub> H <sub>48</sub> Ag <sub>6</sub> N <sub>6</sub> S <sub>12</sub> |
| Formula weight                              | 1524.68                                                                        |
| Temperature                                 | 100 K                                                                          |
| Crystal system                              | orthorhombic                                                                   |
| Space group                                 | P2 <sub>1</sub> 2 <sub>1</sub> 2 <sub>1</sub>                                  |
| a/Å                                         | 15.4231(12)                                                                    |
| b/Å                                         | 16.7198(13)                                                                    |
| c/Å                                         | 17.9114(14)                                                                    |
| α/°                                         | 90                                                                             |
| β/°                                         | 90                                                                             |
| γ/°                                         | 90                                                                             |
| Z                                           | 4                                                                              |
| Volume/Å <sup>3</sup>                       | 4618.8(6)                                                                      |
| ρ <sub>calc</sub> /g/cm <sup>3</sup>        | 2.193                                                                          |
| μ/mm <sup>-1</sup>                          | 3.069                                                                          |
| F(000)                                      | 2976.0                                                                         |
| Crystal size/mm <sup>3</sup>                | 0.1 × 0.1 × 0.1                                                                |
| Radiation                                   | MoKα (λ = 0.71073)                                                             |
| 2θ range for data collection/°              | 3.332 to 52.714                                                                |
| Index ranges                                | -19 ≤ h ≤ 19, -20 ≤ k ≤ 20, -22 ≤ l ≤ 22                                       |
| Reflections collected                       | 58533                                                                          |
| Independent reflections                     | 9363 [R <sub>int</sub> = 0.0301, R <sub>sigma</sub> = 0.0181]                  |
| Data/restraints/parameters                  | 9363/0/493                                                                     |
| Goodness-of-fit on F <sup>2</sup>           | 1.152                                                                          |
| Final R indexes [I ≥ 2σ (I)]                | R <sub>1</sub> = 0.0295, wR <sub>2</sub> = 0.0799                              |
| Final R indexes [all data]                  | R <sub>1</sub> = 0.0295, wR <sub>2</sub> = 0.0799                              |
| Largest diff. peak/hole / e Å <sup>-3</sup> | 2.61/-1.50                                                                     |
| Flack parameter                             | 0.096(4)                                                                       |

**Table S2.** X-ray crystal structure of S-AgSMe

|                                             |                                                                                |
|---------------------------------------------|--------------------------------------------------------------------------------|
| Identification code                         | 2342766                                                                        |
| Empirical formula                           | C <sub>30</sub> H <sub>48</sub> Ag <sub>6</sub> N <sub>6</sub> S <sub>12</sub> |
| Formula weight                              | 1524.68                                                                        |
| Temperature                                 | 100 K                                                                          |
| Crystal system                              | orthorhombic                                                                   |
| Space group                                 | P2 <sub>1</sub> 2 <sub>1</sub> 2 <sub>1</sub>                                  |
| a/Å                                         | 15.4401(4)                                                                     |
| b/Å                                         | 16.7151(4)                                                                     |
| c/Å                                         | 17.8546(4)                                                                     |
| α/°                                         | 90                                                                             |
| β/°                                         | 90                                                                             |
| γ/°                                         | 90                                                                             |
| Volume/Å <sup>3</sup>                       | 4607.96(19)                                                                    |
| Z                                           | 4                                                                              |
| ρ <sub>calc</sub> /g/cm <sup>3</sup>        | 2.198                                                                          |
| μ/mm <sup>-1</sup>                          | 3.076                                                                          |
| F(000)                                      | 2976.0                                                                         |
| Crystal size/mm <sup>3</sup>                | 0.1 × 0.1 × 0.1                                                                |
| Radiation                                   | MoKα (λ = 0.71073)                                                             |
| 2θ range for data collection/°              | 5.174 to 54.24                                                                 |
| Index ranges                                | -19 ≤ h ≤ 19, -20 ≤ k ≤ 20, -22 ≤ l ≤ 22                                       |
| Reflections collected                       | 58928                                                                          |
| Independent reflections                     | 10156 [R <sub>int</sub> = 0.0392, R <sub>sigma</sub> = 0.0272]                 |
| Data/restraints/parameters                  | 10156/0/493                                                                    |
| Goodness-of-fit on F <sup>2</sup>           | 1.102                                                                          |
| Final R indexes [I ≥ 2σ (I)]                | R <sub>1</sub> = 0.0203, wR <sub>2</sub> = 0.0386                              |
| Final R indexes [all data]                  | R <sub>1</sub> = 0.0224, wR <sub>2</sub> = 0.0393                              |
| Largest diff. peak/hole / e Å <sup>-3</sup> | 0.59/-0.45                                                                     |
| Flack parameter                             | -0.024(11)                                                                     |

**Table S3.** X-ray crystal structure of R-AgOMe

|                                             |                                                                                                              |
|---------------------------------------------|--------------------------------------------------------------------------------------------------------------|
| Identification code                         | 2342764                                                                                                      |
| Empirical formula                           | C <sub>31</sub> H <sub>50</sub> Ag <sub>6</sub> Cl <sub>2</sub> N <sub>6</sub> O <sub>6</sub> S <sub>6</sub> |
| Formula weight                              | 1513.25                                                                                                      |
| Temperature                                 | 100 K                                                                                                        |
| Crystal system                              | orthorhombic                                                                                                 |
| Space group                                 | P2 <sub>1</sub> 2 <sub>1</sub> 2 <sub>1</sub>                                                                |
| a/Å                                         | 12.2559(8)                                                                                                   |
| b/Å                                         | 19.1800(12)                                                                                                  |
| c/Å                                         | 20.0247(14)                                                                                                  |
| α/°                                         | 90                                                                                                           |
| β/°                                         | 90                                                                                                           |
| γ/°                                         | 90                                                                                                           |
| Volume/Å <sup>3</sup>                       | 4707.2(5)                                                                                                    |
| Z                                           | 4                                                                                                            |
| ρ <sub>calc</sub> /g/cm <sup>3</sup>        | 2.135                                                                                                        |
| μ/mm <sup>-1</sup>                          | 2.873                                                                                                        |
| F(000)                                      | 2952.0                                                                                                       |
| Crystal size/mm <sup>3</sup>                | ? × ? × ?                                                                                                    |
| Radiation                                   | MoKα (λ = 0.71073)                                                                                           |
| 2θ range for data collection/°              | 2.94 to 54.986                                                                                               |
| Index ranges                                | -15 ≤ h ≤ 15, -23 ≤ k ≤ 24, -25 ≤ l ≤ 25                                                                     |
| Reflections collected                       | 57878                                                                                                        |
| Independent reflections                     | 10652 [Rint = 0.0394, Rsigma = 0.0268]                                                                       |
| Data/restraints/parameters                  | 10652/12/521                                                                                                 |
| Goodness-of-fit on F <sup>2</sup>           | 1.150                                                                                                        |
| Final R indexes [I ≥ 2σ (I)]                | R <sub>1</sub> = 0.0230, wR <sub>2</sub> = 0.0573                                                            |
| Final R indexes [all data]                  | R <sub>1</sub> = 0.0231, wR <sub>2</sub> = 0.0574                                                            |
| Largest diff. peak/hole / e Å <sup>-3</sup> | 0.75/-1.28                                                                                                   |
| Flack parameter                             | 0.18(2)                                                                                                      |

**Table S4.** X-ray crystal structure of S-AgOMe

|                                                |                                                                                              |
|------------------------------------------------|----------------------------------------------------------------------------------------------|
| Identification code                            | 2342765                                                                                      |
| Empirical formula                              | C <sub>30</sub> H <sub>44</sub> Ag <sub>6</sub> N <sub>6</sub> O <sub>6</sub> S <sub>6</sub> |
| Formula weight                                 | 1424.29                                                                                      |
| Temperature                                    | 100 K                                                                                        |
| Crystal system                                 | trigonal                                                                                     |
| Space group                                    | R-3                                                                                          |
| a/Å                                            | 35.3936(6)                                                                                   |
| b/Å                                            | 35.3936(6)                                                                                   |
| c/Å                                            | 11.7131(3)                                                                                   |
| $\alpha/^\circ$                                | 90                                                                                           |
| $\beta/^\circ$                                 | 90                                                                                           |
| $\gamma/^\circ$                                | 120                                                                                          |
| Volume/Å <sup>3</sup>                          | 12707.3(4)                                                                                   |
| Z                                              | 9                                                                                            |
| $\rho_{\text{calc}}/\text{g/cm}^3$             | 1.675                                                                                        |
| $\mu/\text{mm}^{-1}$                           | 2.297                                                                                        |
| F(000)                                         | 6228.0                                                                                       |
| Crystal size/mm <sup>3</sup>                   | 0.1 × 0.1 × 0.1                                                                              |
| Radiation                                      | MoK $\alpha$ ( $\lambda$ = 0.71073)                                                          |
| 2 $\theta$ range for data collection/ $^\circ$ | 5.92 to 50.08                                                                                |
| Index ranges                                   | -42 ≤ h ≤ 42, -42 ≤ k ≤ 40, -13 ≤ l ≤ 13                                                     |
| Reflections collected                          | 90046                                                                                        |
| Independent reflections                        | 4999 [Rint = 0.0997, Rsigma = 0.0308]                                                        |
| Data/restraints/parameters                     | 4999/0/245                                                                                   |
| Goodness-of-fit on F <sup>2</sup>              | 1.153                                                                                        |
| Final R indexes [ $ I  \geq 2\sigma(I)$ ]      | R <sub>1</sub> = 0.0899, wR <sub>2</sub> = 0.2375                                            |
| Final R indexes [all data]                     | R <sub>1</sub> = 0.1049, wR <sub>2</sub> = 0.2479                                            |
| Largest diff. peak/hole / e Å <sup>-3</sup>    | 3.34/-1.56                                                                                   |

**Table S5.** X-ray crystal structure of R-AgOPh

|                                             |                                                                                              |
|---------------------------------------------|----------------------------------------------------------------------------------------------|
| Identification code                         | 2342768                                                                                      |
| Empirical formula                           | C <sub>60</sub> H <sub>60</sub> Ag <sub>6</sub> N <sub>6</sub> O <sub>6</sub> S <sub>6</sub> |
| Formula weight                              | 1800.72                                                                                      |
| Temperature                                 | 100 K                                                                                        |
| Crystal system                              | orthorhombic                                                                                 |
| Space group                                 | P2 <sub>1</sub> 2 <sub>1</sub> 2 <sub>1</sub>                                                |
| a/Å                                         | 29.2719(16)                                                                                  |
| b/Å                                         | 12.2808(8)                                                                                   |
| c/Å                                         | 19.1727(12)                                                                                  |
| $\alpha$ /°                                 | 90                                                                                           |
| $\beta$ /°                                  | 90                                                                                           |
| $\gamma$ /°                                 | 90                                                                                           |
| Volume/Å <sup>3</sup>                       | 6892.2(7)                                                                                    |
| Z                                           | 4                                                                                            |
| $\rho_{\text{calc}}$ /g/cm <sup>3</sup>     | 1.735                                                                                        |
| $\mu$ /mm <sup>-1</sup>                     | 1.903                                                                                        |
| F(000)                                      | 3552.0                                                                                       |
| Crystal size/mm <sup>3</sup>                | 0.1 × 0.1 × 0.1                                                                              |
| Radiation                                   | MoK $\alpha$ ( $\lambda$ = 0.71073)                                                          |
| 2 $\theta$ range for data collection/°      | 3.938 to 52.816                                                                              |
| Index ranges                                | -36 ≤ h ≤ 36, -15 ≤ k ≤ 15, -23 ≤ l ≤ 23                                                     |
| Reflections collected                       | 82797                                                                                        |
| Independent reflections                     | 14133 [R <sub>int</sub> = 0.1251, R <sub>sigma</sub> = 0.0816]                               |
| Data/restraints/parameters                  | 14133/841/746                                                                                |
| Goodness-of-fit on F <sup>2</sup>           | 1.244                                                                                        |
| Final R indexes [ $ I  \geq 2\sigma(I)$ ]   | R <sub>1</sub> = 0.1520, wR <sub>2</sub> = 0.3351                                            |
| Final R indexes [all data]                  | R <sub>1</sub> = 0.1718, wR <sub>2</sub> = 0.3497                                            |
| Largest diff. peak/hole / e Å <sup>-3</sup> | 3.04/-2.68                                                                                   |
| Flack parameter                             | 0.08(2)                                                                                      |

**Table S6.** X-ray crystal structure of S-AgSPh

|                                             |                                                                                |
|---------------------------------------------|--------------------------------------------------------------------------------|
| Identification code                         | 2351225                                                                        |
| Empirical formula                           | C <sub>60</sub> H <sub>60</sub> Ag <sub>6</sub> N <sub>6</sub> S <sub>12</sub> |
| Formula weight                              | 1897.08                                                                        |
| Temperature                                 | 100 K                                                                          |
| Crystal system                              | tetragonal                                                                     |
| Space group                                 | P4 <sub>1</sub>                                                                |
| a/Å                                         | 16.0961(8)                                                                     |
| b/Å                                         | 16.0961(8)                                                                     |
| c/Å                                         | 50.412(4)                                                                      |
| α/°                                         | 90                                                                             |
| β/°                                         | 90                                                                             |
| γ/°                                         | 90                                                                             |
| Volume/Å <sup>3</sup>                       | 13060.9(16)                                                                    |
| Z                                           | 8                                                                              |
| ρ <sub>calc</sub> /g/cm <sup>3</sup>        | 1.930                                                                          |
| μ/mm <sup>-1</sup>                          | 2.192                                                                          |
| F(000)                                      | 7488.0                                                                         |
| Crystal size/mm <sup>3</sup>                | 0.1 × 0.1 × 0.1                                                                |
| Radiation                                   | MoKα (λ = 0.71073)                                                             |
| 2θ range for data collection/°              | 2.656 to 54.984                                                                |
| Index ranges                                | -20 ≤ h ≤ 20, -19 ≤ k ≤ 20, -65 ≤ l ≤ 65                                       |
| Reflections collected                       | 125624                                                                         |
| Independent reflections                     | 29645 [Rint = 0.0552, Rsigma = 0.0434]                                         |
| Data/restraints/parameters                  | 29645/2203/1514                                                                |
| Goodness-of-fit on F <sup>2</sup>           | 1.137                                                                          |
| Final R indexes [I ≥ 2σ (I)]                | R <sub>1</sub> = 0.0586, wR <sub>2</sub> = 0.1580                              |
| Final R indexes [all data]                  | R <sub>1</sub> = 0.0589, wR <sub>2</sub> = 0.1582                              |
| Largest diff. peak/hole / e Å <sup>-3</sup> | 3.26/-1.51                                                                     |
| Flack parameter                             | 0.34(4)                                                                        |



**Table S7.** The distance of silver atoms in the core of R-AgOMe and R-AgOPh

|                                  |                                                                                   |                                                                                     |
|----------------------------------|-----------------------------------------------------------------------------------|-------------------------------------------------------------------------------------|
|                                  | 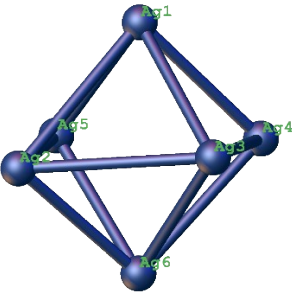 |  |
|                                  | R-AgOMe                                                                           | R-AgOPh                                                                             |
| Ag <sub>1</sub> -Ag <sub>2</sub> | 3.2899 Å                                                                          | 3.307 Å                                                                             |
| Ag <sub>1</sub> -Ag <sub>3</sub> | 3.0675 Å                                                                          | -                                                                                   |
| Ag <sub>1</sub> -Ag <sub>4</sub> | 3.0014 Å                                                                          | 2.990 Å                                                                             |
| Ag <sub>1</sub> -Ag <sub>5</sub> | 2.9981 Å                                                                          | 3.089 Å                                                                             |
| Ag <sub>2</sub> -Ag <sub>3</sub> | 3.3170 Å                                                                          | -                                                                                   |
| Ag <sub>2</sub> -Ag <sub>5</sub> | 2.9811 Å                                                                          | 2.939 Å                                                                             |
| Ag <sub>2</sub> -Ag <sub>6</sub> | 2.9389 Å                                                                          | 3.243 Å                                                                             |
| Ag <sub>3</sub> -Ag <sub>4</sub> | 2.9674 Å                                                                          | 3.182 Å                                                                             |
| Ag <sub>3</sub> -Ag <sub>6</sub> | 3.0554 Å                                                                          | 2.872 Å                                                                             |
| Ag <sub>4</sub> -Ag <sub>6</sub> | 3.1252 Å                                                                          | 3.277 Å                                                                             |
| Ag <sub>4</sub> -Ag <sub>5</sub> | -                                                                                 | -                                                                                   |
| Ag <sub>5</sub> -Ag <sub>6</sub> | 3.0918 Å                                                                          | 3.180                                                                               |
| Volume-core                      | 123.51 Å <sup>3</sup>                                                             | 124.80 Å <sup>3</sup>                                                               |

**Table S8.** The distance between R-AgSMe, R-AgOMe and adjacent cluster

|            | R-AgSMe | R-AgOMe |
|------------|---------|---------|
| Nc1...Nc2  | 11.70 Å | 11.74 Å |
| Nc1...Nc3  | 11.37 Å | 12.26 Å |
| Nc1...Nc4  | 11.75 Å | 12.38 Å |
| Nc1...Nc5  | 11.93 Å | 11.73 Å |
| Nc1...Nc6  | 12.13 Å | 11.73 Å |
| Nc1...Nc7  | 11.38 Å | 12.25 Å |
| Nc1...Nc8  | 11.93 Å | 13.89 Å |
| Nc1...Nc9  | 11.38 Å | 11.74 Å |
| Nc1...Nc10 | 12.38 Å | 13.89 Å |
| Nc1...Nc11 | 11.70 Å | 13.89 Å |
| Nc1...Nc12 | 12.13 Å | 13.89 Å |
| Nc1...Nc13 | 11.37 Å | 11.74 Å |
| Nc1...Nc14 | -       | 11.05 Å |
| Nc1...Nc15 | -       | 11.05 Å |

## 5 Additional experimental data and figures

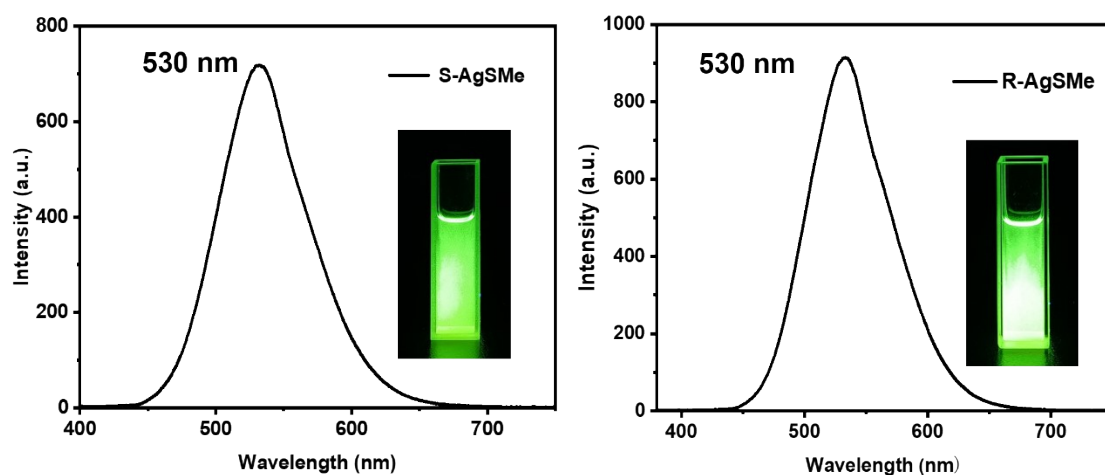

**Fig.S1.** The photoluminescence (PL) spectra of S/R-AgSMe in EtOH suspension.

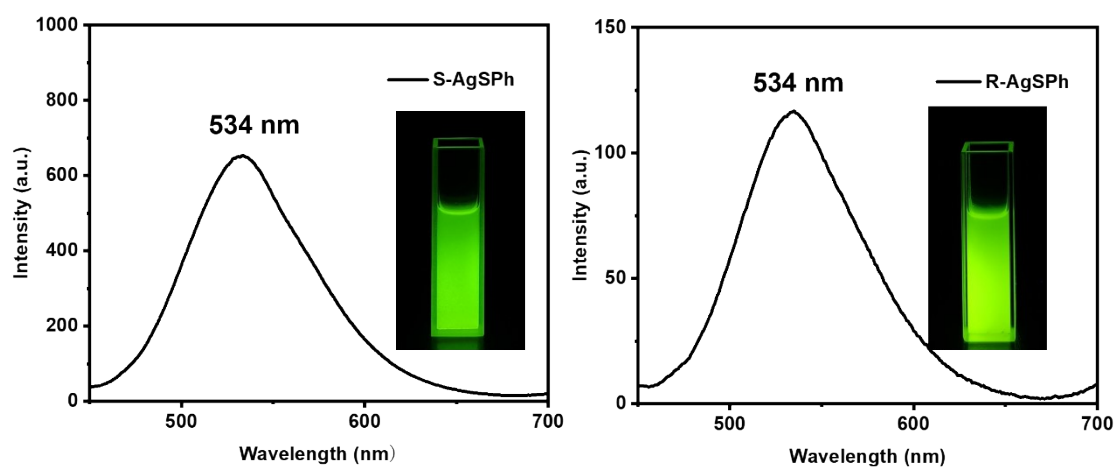

**Fig.S2.** The PL spectra of S/R-AgSPh in EtOH suspension.

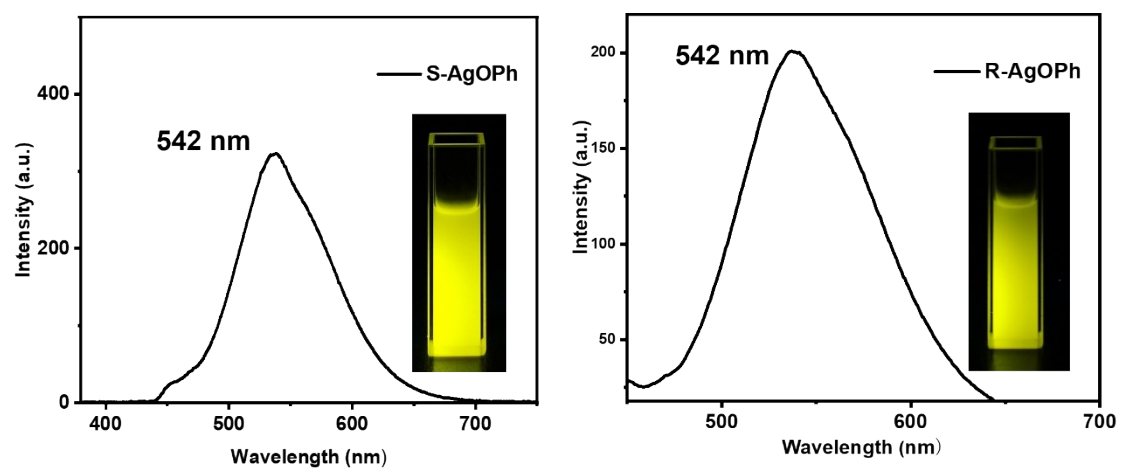

**Fig.S3.** The photoluminescence spectra of S/R-AgOPh in EtOH suspension.

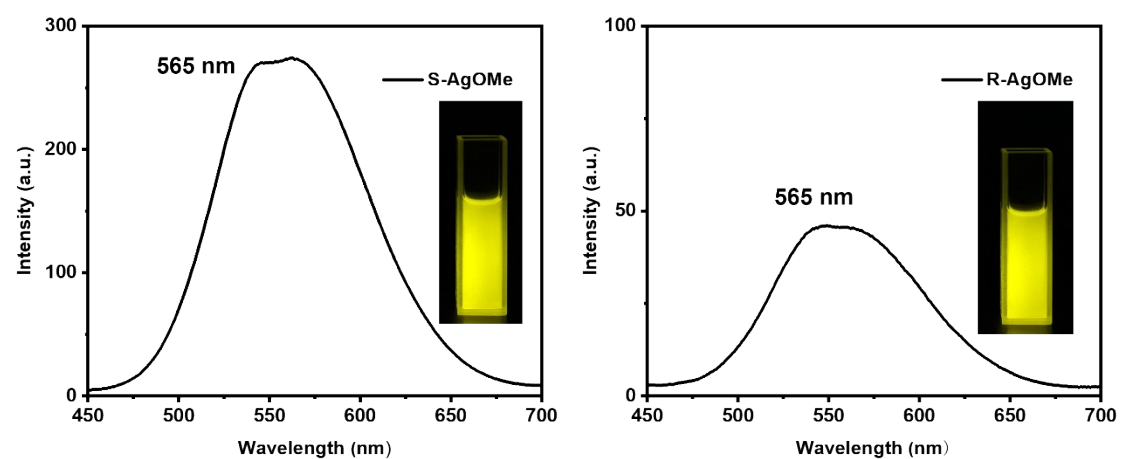

**Fig.S4.** The photoluminescence spectra of S/R-AgOMe in EtOH suspension.

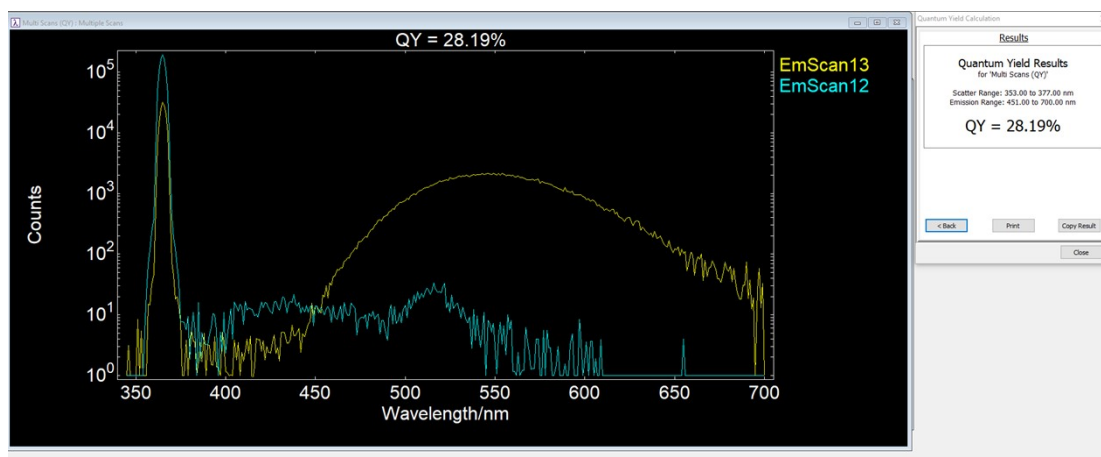

**Fig.S5.** The quantum yield of R-AgSMe in the solid state.

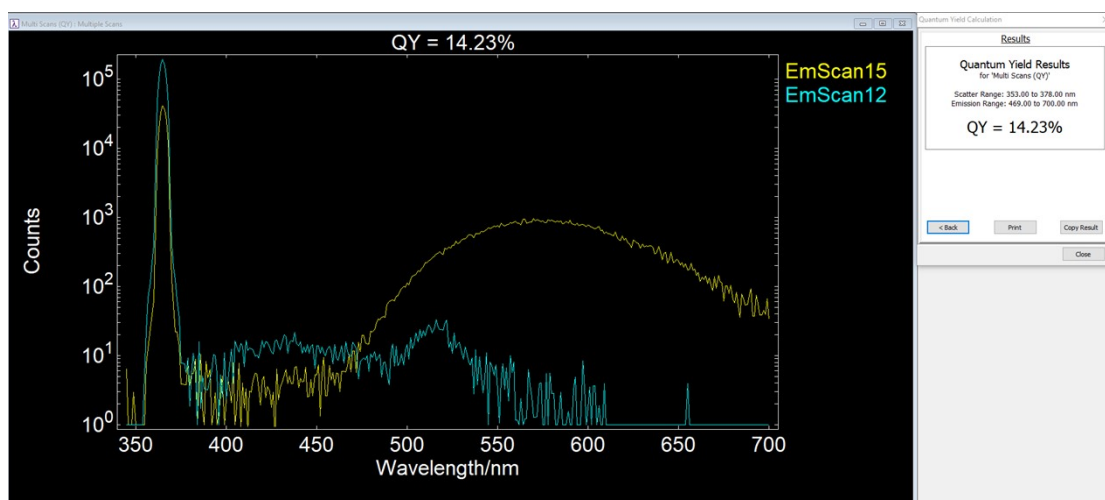

**Fig.S6.** The quantum yield of R-AgOMe in the solid state.

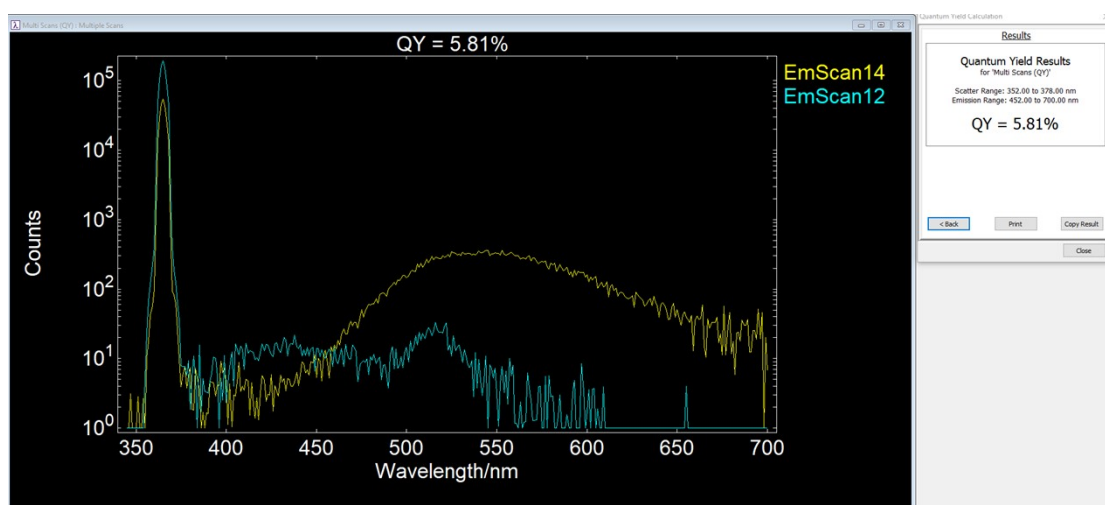

**Fig.S7.** The quantum yield of R-AgSPh in the solid state.

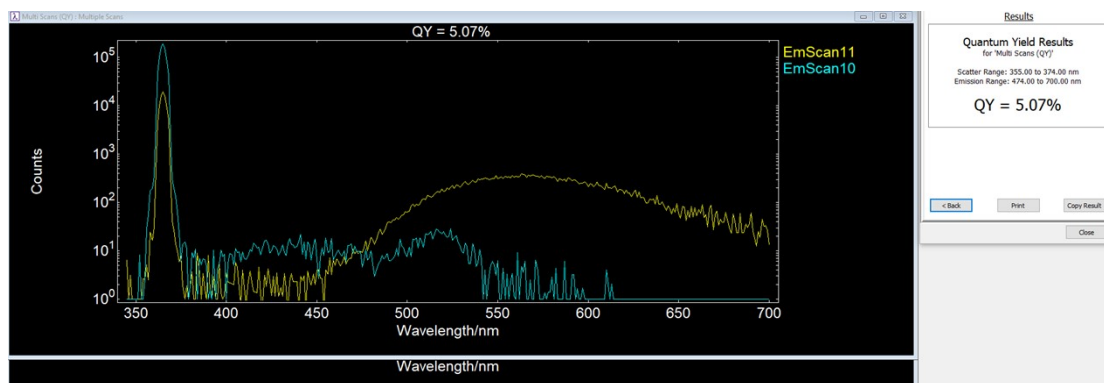

**Fig.S8.** The quantum yield of R-AgOPh in the solid state.

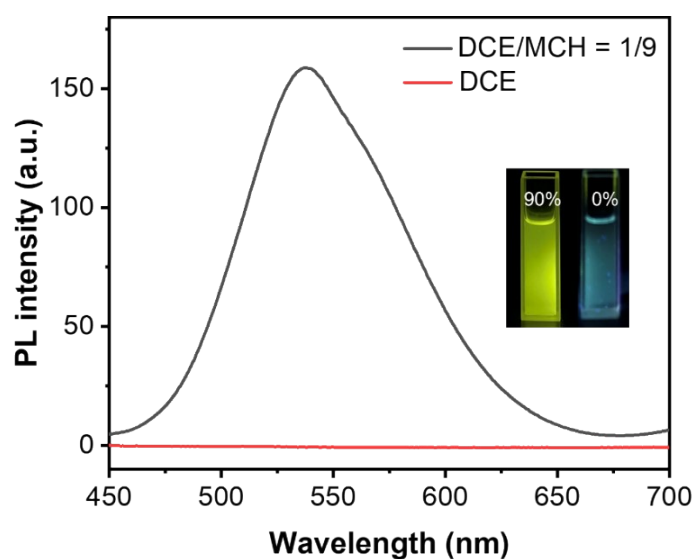

**Fig.S9.** a) PL spectra of R-AgSMe in a mixed solvent of DCE (1,2-Dichloroethane) and MCH (methylcyclohexane) at  $1 \times 10^{-4}$  mol/L.

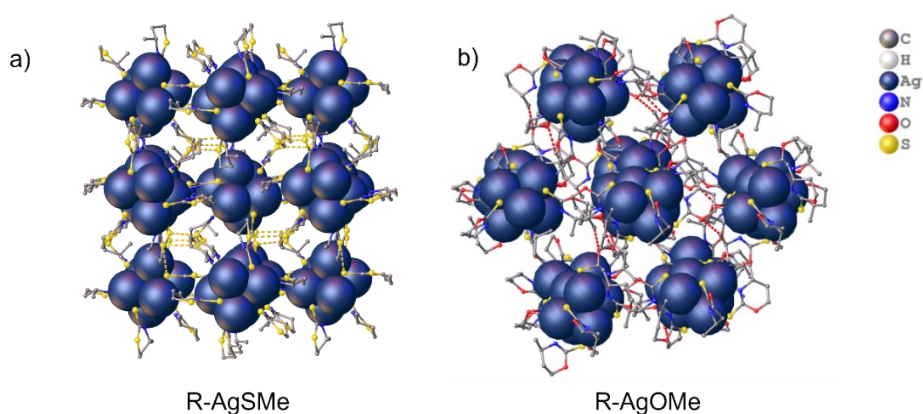

**Fig.S10.** a) The stacking of R-AgSMe cluster in the single crystal driven by S $\cdots$ S interaction, b) The stacking of R-AgOMe cluster in the single crystal driven by C $\cdots$ O interaction.

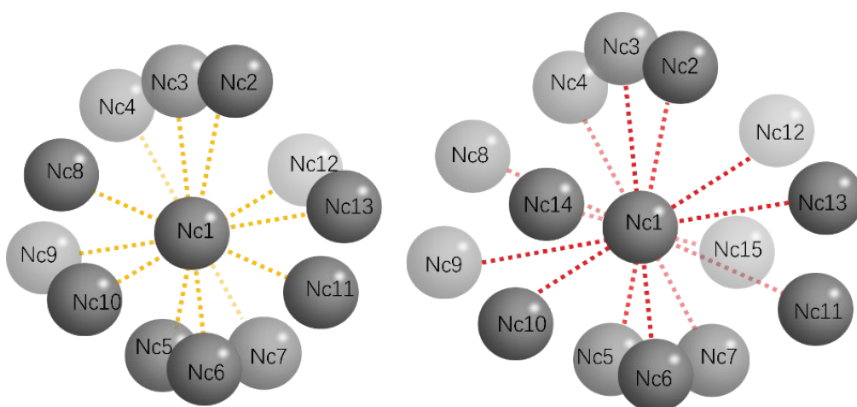

**Fig.S11.** The left is a schematic diagram of the distance between R-AgSMe and adjacent cluster. The right is a schematic diagram of the distance between R-AgOMe and adjacent cluster. Nc: Nanocluster.

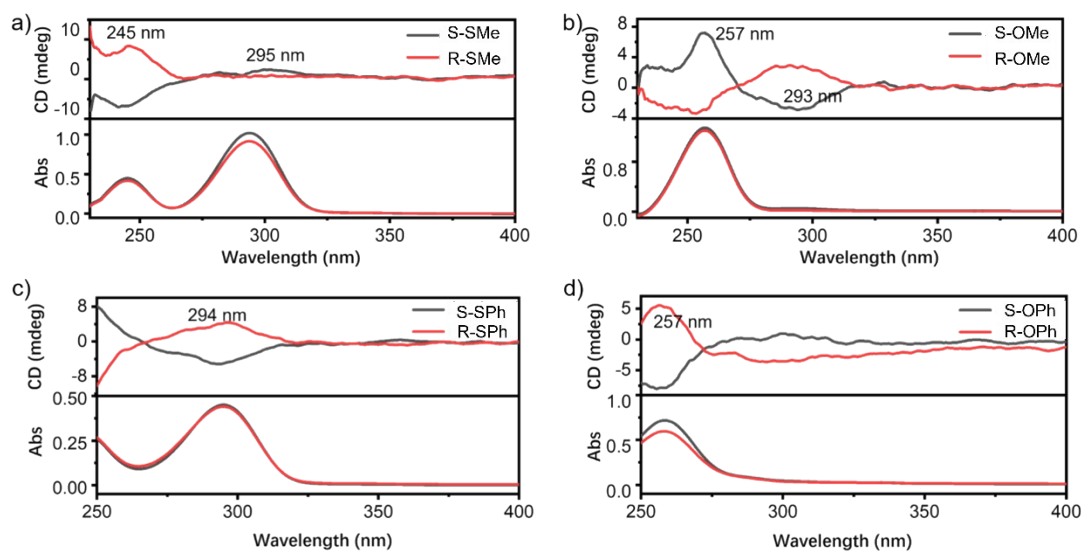

**Fig.S12.** CD spectra of a) S/R-SMe, b) S/R-OMe, c) S/R-SPh, and d) S/R-OPh in DCM solution. The concentration of ligands was fixed at  $1.0 \times 10^{-3}$  mol/L.

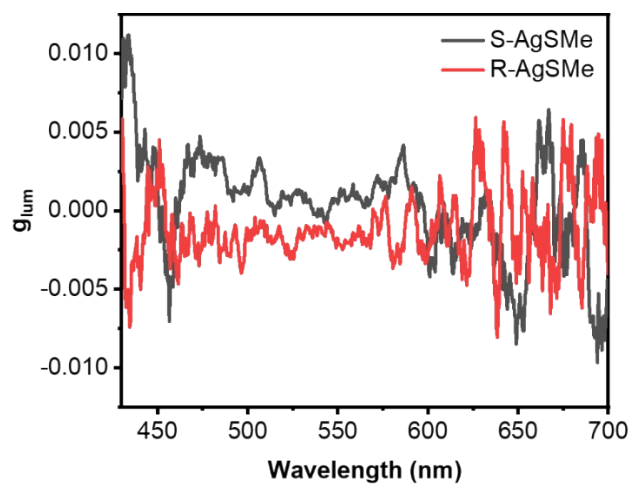

**Fig.S13.** The  $g_{lum}$  values of S/R-AgSMe.

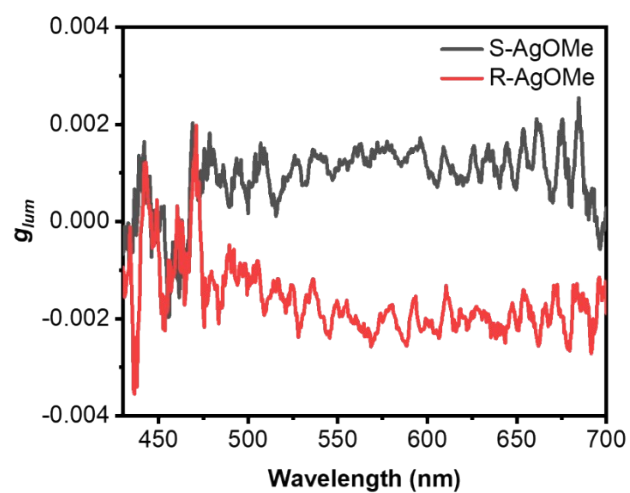

**Fig.S14.** The  $g_{lum}$  values of S/R-AgOMe.

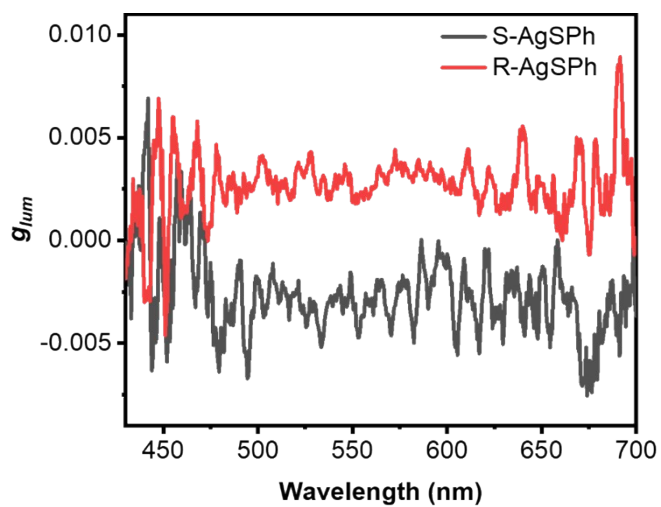

**Fig.S15.** The  $g_{lum}$  values of S/R-AgSPh.



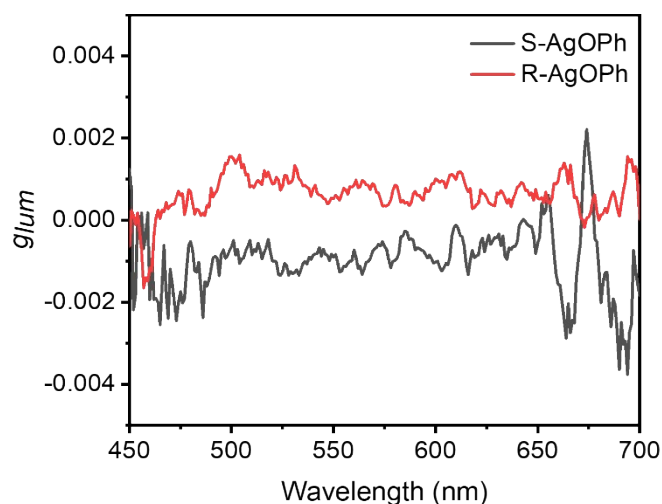

**Fig.S16.** The  $g_{lum}$  values of S/R-AgOPh.

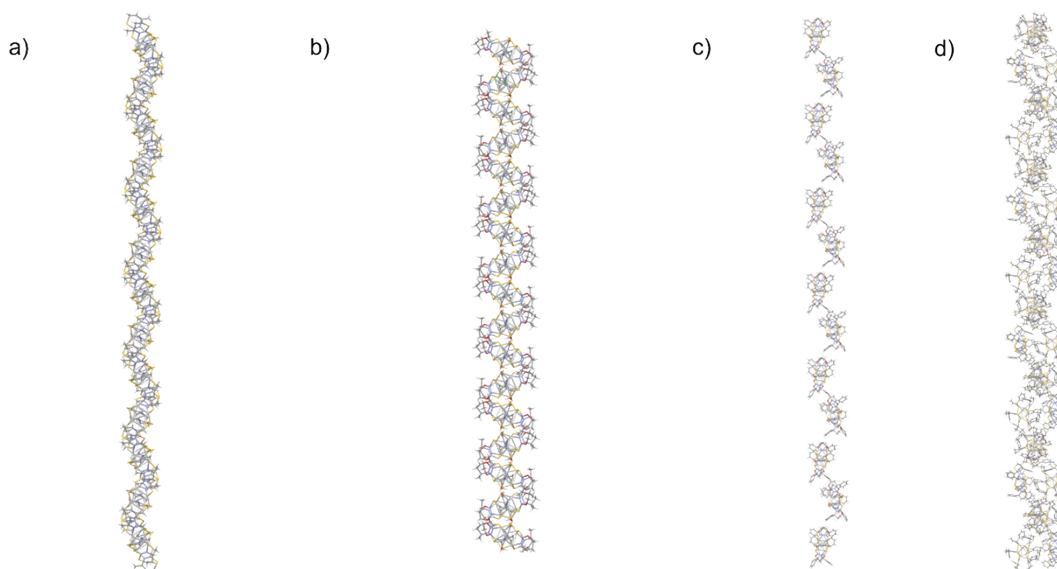

**Fig.S17.** a) C-H $\cdots$ S interaction driven right-handed (P) helical stacking R-AgSMe cluster in the single crystal structure, b) H-C $\cdots$ H interaction driven right-handed (P) helical stacking R-AgOMe cluster in the single crystal structure, and c) C-H $\cdots$  $\pi$  interaction driven left-handed (M) helical stacking R-AgOPh cluster in the single crystal structure. d) The left-handed (M) helical stacking of S-AgSPh cluster driven by H-C $\cdots$ S, H-C $\cdots$ S and C-H $\cdots$  $\pi$  interactions in the single crystal structure.

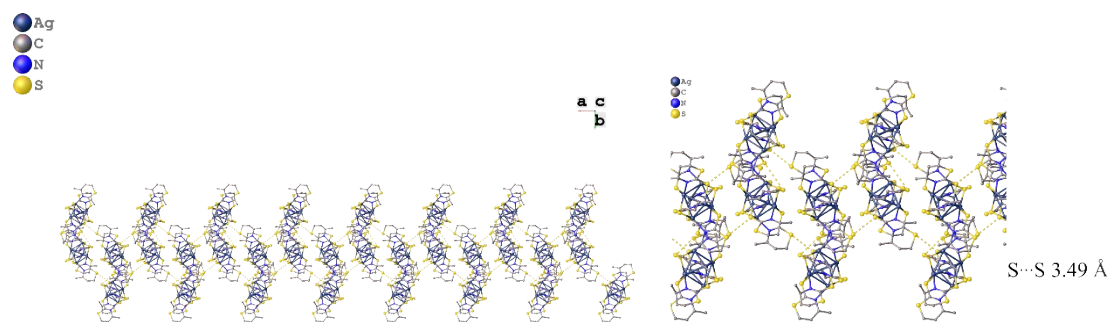

**Fig.S18.** The stacking model of R-AgSMe chains driven by S...S interaction.
